1 Dual RNA-seq provides insight into the biology of the neglected intracellular human pathogen *Orientia*  
2 *tsutsugamushi*

3  
4 Bozena Mika-Gospodorz<sup>#a</sup>, Suparat Giengkam<sup>#b</sup>, Alexander J. Westermann<sup>a,c</sup>, Jantana Wongsantichon<sup>b</sup>,  
5 Willow Kion-Crosby<sup>d</sup>, Suthida Chuenklin<sup>b</sup>, Loo Chien Wang<sup>e</sup>, Piyanate Sunyakumthorn<sup>f</sup>, Radoslaw M.  
6 Sobota<sup>j</sup>, Selvakumar Subbian<sup>h</sup>, Jörg Vogel<sup>a,c</sup>, Lars Barquist<sup>#\*a,g</sup> and Jeanne Salje<sup>#\*b,h,i</sup>

7  
8 Running title: RNA sequencing of *Orientia tsutsugamushi*

9  
10 Helmholtz Institute for RNA-based Infection Research (HIRI), Helmholtz Centre for Infection Research  
11 (HZI), Würzburg, Germany<sup>a</sup>

12 Mahidol-Oxford Tropical Medicine Research Unit, Faculty of Tropical Medicine, Mahidol University,  
13 Bangkok, Thailand<sup>b</sup>;

14 Institute for Molecular Infection Biology (IMIB), University of Würzburg, Würzburg, Germany<sup>c</sup>

15 Rutgers, the State Univeristy of New Jersey, New Jersey, USA<sup>d</sup>

16 Functional Proteomics Laboratory, Institute of Molecular and Cell Biology, Agency for  
17 Science, Technology and Research (A\*STAR), Singapore<sup>e</sup>.

18 Armed Forces Research Institute of Medical Sciences, Bangkok, Thailand<sup>f</sup>;

19 Faculty of Medicine, University of Würzburg, Würzburg, Germany<sup>g</sup>;

20 Public Health Research Institute, Rutgers University, New Jersey, USA<sup>h</sup>;

21 Centre for Tropical Medicine and Global Health, Nuffield Department of Medicine, University of Oxford,  
22 Oxford, United Kingdom<sup>i</sup>;

23 SingMass - National Mass Spectrometry Laboratory, Institute of Molecular and Cell Biology, Agency for

24 Science, Technology and Research (A\*STAR), Singapore<sup>j</sup>

25

26

27 # these authors contributed equally

28 \*address correspondence to [js2522@njms.rutgers.edu](mailto:js2522@njms.rutgers.edu); [lars.barquist@helmholtz-hiri.de](mailto:lars.barquist@helmholtz-hiri.de)

## 29 **Summary**

30 Emerging and neglected diseases pose challenges as their biology is frequently poorly understood, and  
31 genetic tools often do not exist to manipulate the responsible pathogen. Organism agnostic sequencing  
32 technologies offer a promising approach to understand the molecular processes underlying these diseases.  
33 Here we apply dual RNA-seq to *Orientia tsutsugamushi* (Ot), an obligate intracellular bacterium and the  
34 causative agent of the vector-borne human disease scrub typhus. Half the Ot genome is composed of  
35 repetitive DNA, and there is minimal collinearity in gene order between strains. Integrating RNA-seq,  
36 comparative genomics, proteomics, and machine learning, we investigated the transcriptional architecture  
37 of Ot, including operon structure and non-coding RNAs, and found evidence for wide-spread post-  
38 transcriptional antisense regulation. We compared the host response to two clinical isolates and identified  
39 distinct immune response networks that are up-regulated in response to each strain, leading to predictions  
40 of relative virulence which were confirmed in a mouse infection model. Thus, dual RNA-seq can provide  
41 insight into the biology and host-pathogen interactions of a poorly characterized and genetically  
42 intractable organism such as Ot.

43

44 **Keywords:** neglected and emerging pathogens, intracellular bacteria, dual RNA-seq, transcriptomics,  
45 host-pathogen cell biology, bacterial virulence, antisense transcription.

46 **Main Text**

47 **Introduction**

48 Improved surveillance and diagnostics have led to the recognition of previously neglected bacteria as  
49 serious pathogens, whilst human population growth, globalization and increased travel have contributed  
50 to the emergence of new pathogens and changing patterns of infectious disease. The biology of neglected  
51 and emerging pathogens is often poorly understood, but is essential to developing therapeutic and  
52 preventative strategies. Obligate intracellular pathogens present additional challenges, as many cause  
53 diseases that are difficult to diagnose and are difficult to manipulate experimentally.

54

55 Obligate intracellular bacteria include the Rickettsiales, an order which includes the arthropod and  
56 nematode symbiont *Wolbachia* as well as a number of human and veterinary pathogens. *Orientia*  
57 *tsutsugamushi* (Ot, Class Alphaproteobacteria, Order Rickettsiales, Family Rickettsiaceae) causes the  
58 mite-borne human disease scrub typhus, a leading cause of severe febrile illness in the Asia Pacific region<sup>1</sup>,  
59 home to roughly two thirds of the world's population. Locally acquired cases in the Middle East and Latin  
60 America suggest that this disease may be more widespread than previously appreciated<sup>2,3</sup>. Under-  
61 recognition and under-reporting are a major problem in scrub typhus because unambiguous diagnosis is  
62 difficult, and awareness is low amongst many clinicians. Symptoms are non-specific and include  
63 headache, fever, rash, and lymphadenopathy beginning 7-14 days after inoculation via a feeding larval  
64 stage mite. If untreated, this can progress to cause multiple organ failure and death. In the mite vector Ot  
65 colonizes the ovaries and salivary glands. During acute infection of its mammalian host, the bacteria infect  
66 endothelial cells, dendritic cells and monocytes/macrophages at the mite bite site<sup>4</sup>, and then disseminate  
67 via blood and lymphatic vessels to multiple organs including lung, liver, kidney, spleen and brain<sup>5</sup>.

68 Ot strains are highly variable in terms of antigenicity and virulence. Hundreds of strains have been  
69 described based on differences in the sequence of the surface protein TSA56<sup>9-11</sup>. These strains are  
70 classified into 7 geographically diverse serotype groups, dominated by the Karp, Kato and Gilliam  
71 groups<sup>12</sup>. As with many other pathogenic bacteria, whole genome sequencing has revealed that serotype-  
72 based groupings do not necessarily reflect phylogenetic relationships<sup>8</sup>. Different strains of Ot exhibit  
73 different levels of virulence<sup>19-21</sup>, dependent on both bacterial and host genotype. For example, strain Karp  
74 (serotype group Karp) causes lethal infection in BALBc and C3H/He mice at low doses, strain Gilliam  
75 (serotype group Gilliam) causes lethal infection in C3H/He but not BALBc mice at similar doses, whilst  
76 strain TA716 (serotype group TA716) does not cause lethal infection in either mouse model at similar  
77 doses<sup>20,22</sup>. The underlying causes of this variation in infection outcomes remain obscure.

78  
79 Dual RNA-seq quantifies RNA transcripts of intracellular pathogens and host cells in a single  
80 experiment<sup>24,25</sup>, and can provide insight into both the host and pathogen response to infection. For  
81 example, dual RNA-seq has been used to study obligate intracellular *Chlamydia trachomatis*<sup>26</sup> revealing  
82 the rewiring of *Chlamydia* metabolism during the onset of an infection of human epithelial cells, together  
83 with the corresponding host responses. Here we apply dual RNA-seq to deepen our understanding of the  
84 RNA biology of Ot and its consequences for virulence. We survey the transcriptome of Ot strain Karp,  
85 identifying non-coding RNAs and transcribed operons in a genome broken by frequent recombination and  
86 transposition of the rickettsial amplified genetic element (RAGE) integrative and conjugative element  
87 (ICE)<sup>6,7</sup>. Integrating proteomic measurements, we further provide evidence that RAGE genes are regulated  
88 through prevalent antisense transcription. Finally, we compare infection between strain Karp and strain  
89 UT176 identifying a core host response to Ot dominated by type-I interferon signaling, as well as distinct

90 immune responses to each strain. We show that this in turn leads to different outcomes in a mouse model  
91 of scrub typhus.  
92

## 93 **Results**

### 94 **Dual RNA-seq of *Orientia tsutsugamushi* infecting endothelial cells**

95 We focused on two Ot clinical isolates: Karp, taken from a patient in New Guinea in 1943<sup>27</sup>, and UT176,  
96 a separate strain in the same serotype group as Karp, taken from a patient in northern Thailand in 2004<sup>28</sup>.  
97 These strains are closely related, with a sequence identity of 95% in their TSA56 gene (used to classify  
98 strains)<sup>8</sup>. Consistent with a closed pan-genome for Ot, the gene content of Karp and UT176 are similar,  
99 with differences primarily in gene copy number, pseudogenes, and gene order along the genome. Human  
100 vein endothelial cells (HUVEC) were selected as host cells due to their similarity to cell types involved in  
101 both early and advanced infection. HUVEC cells were infected with bacteria at an MOI of 100:1 and  
102 grown for 5 days (Fig. 1A), by which point host cells were heavily loaded with bacteria (Fig. 1C, Supp.  
103 Figs 1, 2). Uninfected HUVEC cells were grown in parallel. After 5 days total RNA was isolated, depleted  
104 for rRNA, converted to cDNA and sequenced to ~35 million reads per library using Illumina technology.  
105 Reads were mapped to the completed genomes of Karp, UT176<sup>8</sup> and, in parallel, the human genome. As  
106 the *Orientia* genome is repeat-rich, we additionally applied model-based quantification with Salmon<sup>29</sup>  
107 which uses uniquely mapping reads to assign multi-mapping reads to these transcriptomes to improve our  
108 estimates of transcript abundance (see Methods).

109

110 We observed 17.1-17.5% bacterial reads in HUVECs infected with Karp and 2.8-4.9% bacterial reads in  
111 HUVECs infected with UT176 (Fig. 1D, Supp. Fig. 3). This difference likely reflects growth rate  
112 differences between Karp and UT176, which have doubling times of 19 and 27 hours in HUVEC,  
113 respectively (Fig. 1B). The distribution of reads to RNA classes (Fig. 1D) indicated efficient depletion of  
114 ribosomal transcripts in the host transcriptome (<0.001% human rRNA reads). In contrast, we found an  
115 average of 16% and 30% rRNA reads in Karp and UT176, respectively. Most of these remaining bacterial

116 ribosomal reads were derived from 5S rRNA (Supp. Table), likely reflecting the divergence of 5S rRNA  
117 sequences between Ot and bacterial model organisms used for optimization of the Ribo-Zero approach  
118 ([https://emea.illumina.com/products/selection-tools/ribo-zero-kit-species-](https://emea.illumina.com/products/selection-tools/ribo-zero-kit-species-compatibility.html?langsel=/de/)  
119 [compatibility.html?langsel=/de/](https://emea.illumina.com/products/selection-tools/ribo-zero-kit-species-compatibility.html?langsel=/de/)). This notwithstanding, reads mapping to coding sequences (CDSs) were  
120 not only abundant in the HUVEC data subset (53% of all host-mapped reads), but also in the Ot-specific  
121 reads (38% of the Karp- and 49% of the UT176-mapped reads), allowing differential expression analysis.  
122 Dual RNA-seq also readily detected the various non-coding RNA classes from both host and bacteria (Fig.  
123 1E). Of 657 predicted core Ot genes<sup>8</sup> 491 were expressed and 212 were highly expressed (see Methods  
124 for definitions).

125

### 126 **Ot ncRNAs and evidence for tmRNA processing**

127 Bacterial genomes encode many non-coding (nc)RNAs. Among the most conserved are several  
128 specialized, abundant housekeeping ncRNAs, including the RNA components of ribonuclease P (RNase  
129 P), the signal recognition particle (SRP), and transfer-messenger RNA (tmRNA), all of which were  
130 detected in the Karp transcriptome data (Fig. 1E, Supp. Table 1). To validate the RNA-seq data, we  
131 performed Northern blot analysis for conserved housekeeping ncRNAs (Fig. 2A). These include the M1  
132 RNA component of RNase P, a ribozyme responsible for tRNA processing, and 4.5S, the RNA component  
133 of the SRP involved in translocation of membrane proteins. Both ran at their expected lengths of ~385 and  
134 ~100 nt, respectively. However, a second stronger band for the M1 transcript ran slightly higher, indicative  
135 of a length of ~450 nt, suggesting the existence of a precursor-M1.

136

137 We also found evidence of tmRNA processing in Ot. tmRNA has both mRNA-like and tRNA-like  
138 features, rescues stalled ribosomes<sup>30</sup>, and is known to contribute to virulence in pathogens as diverse as



139 *Salmonella* Typhimurium<sup>31</sup> and *Francisella tularensis*<sup>32</sup>. In our data, tmRNA appears to be expressed at  
140 unusually high levels, contributing between 3 and 7% of total bacterial reads (Fig 1E), suggesting an  
141 important role in Ot survival in mammalian cells. tmRNA generally consists of a tRNA-like (acceptor)  
142 domain encoded upstream of a short open reading frame (coding domain). However, the transcript has  
143 undergone a circular permutation in some clades of bacteria<sup>33</sup>, including the Alphaproteobacteria<sup>34</sup>, which  
144 requires processing of a precursor transcript into separate, base-pairing acceptor and coding RNA  
145 chains<sup>35,36</sup> (Fig. 2B). We detected three Ot tmRNA forms using Northern blot: (i) a long precursor tmRNA  
146 (372 nt); (ii) a 5' fragment of ~80 nt, the acceptor domain; (iii) and the 3' coding domain of ~240 nt (Fig.  
147 2B). Read coverage over the tmRNA locus in the Karp genome supported a cleavage event within the  
148 loop region that connects the tRNA- and mRNA-like domains in the full-length precursor (Fig. 2C).

149

150 In addition to these universally conserved housekeeping ncRNAs, bacterial genomes encode family-,  
151 genus-, species-, or strain-specific small ncRNAs (sRNAs) to adapt their gene expression to specific  
152 intrinsic and environmental cues<sup>37,38</sup>. Our RNA-seq data identified 55 intergenic sRNA candidates,  
153 between 77-803 nt, in the Karp transcriptome (Supp. Table 1). When normalized to the genome size of  
154 Ot, this is consistent with the number of sRNAs reported in model bacterial pathogens<sup>39-44</sup>.

155

### 156 **Conserved operons in a dynamic genome**

157 The genome of Ot is highly dynamic<sup>8</sup>, and while the timescales and mechanisms of its rearrangements are  
158 unknown they are thought to be driven by an extreme proliferation of mobile elements<sup>6,7</sup>, in particular the  
159 RAGE. The consequences of this are evident when comparing the high degree of synteny in bacteria from  
160 two related 'normal' genera (*Escherichia* and *Salmonella*) to the complete shuffling we observe between  
161 the two Ot strains studied here (Fig. 2D). As bacterial genomes are normally organized into co-transcribed

162 operons of functionally related genes, we wondered how this macroscale loss of synteny would affect  
163 conservation of these transcripts. Using Rockhopper<sup>45</sup> and manual curation, we identified adjacent genes  
164 expressed in a continuous transcript, classifying these as operons. We identified 131 operons fully  
165 conserved between Karp and UT176 (all genes expressed in both strains) and seven partly conserved  
166 (some genes expressed in both strains). Our previous analysis of 8 Ot genomes identified 51 universally  
167 conserved genomic islands, including 35 potential collinear gene clusters containing two to thirteen  
168 genes<sup>8</sup>, and we found evidence for operonic transcripts originating from 24 of these. We also identified  
169 212 and 192 transcribed operons present only in Karp or UT176, respectively, and these were generally  
170 associated with the RAGE mobile element (73% in Karp and 93% in UT176) in contrast to conserved  
171 operons (14% of fully conserved operons, Fig 2E).

172

173 The majority (84%, Supp. Fig. 6) of conserved operons consisted of only two or three genes. Longer  
174 operons tended to encode for core cellular processes, the longest being a 30 gene operon encoding almost  
175 half of Ot ribosomal proteins proximal to the ribosomal RNA operon itself (Fig. 2F). Others included an  
176 8 gene operon involved in iron-sulfur cluster assembly, and 6 and 5 gene operons in distinct loci each  
177 encoding for portions of the NADH-ubiquinone oxidoreductase complex in an organization similar to that  
178 observed in *Rickettsia prowazekii* and eukaryotic mitochondria<sup>46</sup>. In summary, the identification of  
179 cotranscribed gene clusters in a genome as highly dynamic as that of Ot indicates strong selection for  
180 those genes to remain coupled, indicating involvement in the same pathways and likely shared regulation.

181

## 182 **Evidence for Ot RAGE regulation by antisense RNA**

183 The RAGE of Ot is present in at least 185 remnant copies<sup>7</sup>. It encodes an integrase (*int*) and transposase  
184 gene (*tra*), multiple genes from the VirB type IV secretion system (*vir*) and a number of potential effector

185 genes including ankyrin-repeat containing proteins (*ank*), tetratricopeptide repeat containing proteins  
186 (*TPR*), SpoT/RelA genes, DNA methyltransferases and replicative DNA helicases. Many of these genes  
187 are truncated and most RAGE copies are highly degraded, containing only a subset of genes from the  
188 complete element. It is not known if this ICE is still active for transposition, nor whether Ot can express  
189 a functional type IV secretion apparatus. In our RNA-seq dataset ~50% of the most highly expressed genes  
190 were repetitive genes encoded by the RAGE (defined throughout our analysis as integrase, transposase,  
191 conjugal transfer genes and hypothetical genes) in both strains. These same genes were also highly  
192 expressed in the antisense direction (Fig. 3A, Supp. Fig. 6), leading us to hypothesize that the repetitive  
193 RAGE genes may be regulated by antisense gene expression.

194 Antisense transcription is widespread in bacteria<sup>47</sup>, with between 5% and 75% of coding sequences  
195 exhibiting antisense transcription. While functions for a number of specific antisense transcripts have been  
196 described, including regulation through occlusion of the ribosome binding-site or induction of RNase III  
197 mediated decay<sup>48</sup> their relevance as a general functional class remains unclear. Antisense promoters tend  
198 to be weakly conserved<sup>49</sup>, arguing against specific functions, and mathematical modeling has suggested  
199 the majority of antisense transcripts are not expressed at sufficient levels to affect the regulation of their  
200 cognate coding sequence<sup>50</sup>.

201 To explore the relationship between sense and antisense expression of core Ot genes and repetitive RAGE  
202 genes, we combined our Karp RNA-seq dataset with a proteomics dataset generated under the same  
203 experimental growth conditions. We observed substantially fewer RAGE gene products detected by  
204 proteomics, compared with RNA-seq (Fig. 3A). Genes with detected protein products had higher  
205 transcript expression on average compared to those not detected by proteomics (Fig. 3B). However, many  
206 highly expressed transcripts appeared to produce no protein. Given our previous observations, we asked  
207 whether antisense transcription would correlate with protein expression. All genes with detected proteins

208 had an antisense-sense read count ratio of less than 1, in contrast to genes with no detected protein product,  
209 which had an antisense-sense read count spanning several orders of magnitude (Fig. 3C) suggesting  
210 antisense RNA expression may be a factor in inhibiting translation.

211 To test this hypothesis more rigorously, we constructed three logistic regression models to predict protein  
212 detection from our transcriptomic data. The first used only transcripts per million (TPMs) derived from  
213 the sense strand as a predictor; the second used only the antisense-sense read count ratio as a predictor;  
214 the third used both features. Comparisons of the predictive power of these three models showed that  
215 antisense transcription is predictive of protein expression (Fig. 3D). Model 1, relying only on sense  
216 expression, did little better than chance at predicting protein detection. Models 2 and 3, which incorporate  
217 the antisense-sense ratio, led to large improvements in predictive power, suggesting that antisense  
218 transcription plays a wide-spread regulatory role in *Ot*. This was confirmed by cross-validation (Methods,  
219 Supp. Fig. 7). We found significant enrichment for RAGE genes among those with high antisense-sense  
220 ratios (Fig. 3E), suggesting antisense transcription may work to control the expression of selfish genetic  
221 elements at the protein level. Thirty core genes also exhibited an antisense-sense ratio of  $>1$  (Supp. Table  
222 core genes) and these include the chromosomal replication initiator protein DnaA, DNA polymerase  
223 subunit III, an outer membrane autotransporter protein ScaD, glutamine synthetase, three transporters, the  
224 protein export protein SecB and 12 hypothetical proteins. None of these models achieved greater than  
225 67% balanced accuracy, which may be due to both the existence of other modes of post-transcriptional  
226 regulation and the lack of sensitivity in our proteomics. For instance, we have also performed a preliminary  
227 investigation of codon bias and found some evidence for differential codon usage in genes expressed at  
228 the RNA, but not protein, level (Supp. Text, Supp. Fig. 8-9).

229

230 **Differential expression of genes in Karp and UT176**

231 Due to a lack of genetic tools, identification of virulence mechanisms in Ot has been difficult, with only  
232 a small number of antigenic surface proteins and effectors known. As pangenome diversity appears to  
233 primarily be the result of gene duplication and decay, differences in virulence between strains are likely  
234 due to differences in expression. To investigate this hypothesis, we performed differential expression  
235 analysis between Karp and UT176 at 5 d after infection of HUVEC cells. Pathway and gene ontology  
236 (GO) analyses of differentially expressed genes (Fig. 4A, Supp. Table 1) indicated that most pathways  
237 were up-regulated in Karp compared with UT176, including those involved in DNA replication and  
238 metabolism, consistent with Karp's higher growth rate (Fig. 1B). At the gene level (Supp. Table 1, Fig.  
239 4B) we found a number of surface and effector proteins (Anks) were differentially regulated between the  
240 two strains. Ot encodes five autotransporter domain-containing proteins (ScaA-ScaE) and three  
241 immunogenic-type surface antigens (TSA22, TSA47, TSA56). All these surface proteins are  
242 immunogenic, based on their reactivity to patient sera<sup>60</sup>, with TSA56 being the most abundant Ot surface  
243 protein. TSA56 has four variable domains and these lead to strain-specific antibody responses in patients.  
244 TSA47, TSA56, and ScaA have been evaluated as possible vaccine candidates<sup>61,62</sup>. Of the core Ot genes,  
245 those most differentially expressed between Karp and UT176 were *scaE*, *tsa56*, and *tsa22* (1.39, 3.06 and  
246 3.94 logFC in Karp over UT176, respectively). In contrast, *scaD* levels were increased in UT176 but to a  
247 lesser degree (0.80 logFC in UT176 over Karp). Given their high immunogenicity it is likely that their  
248 differential expression results in differential host responses.

249

250 Genes for Ank and tetratricopeptide repeat-containing proteins (TPR) are present in 33 (Ank)/29 (TPR)  
251 and 21 (Ank)/22 (TPR) copies in Karp and UT176, respectively<sup>8</sup>. Some *ank* genes function as effectors  
252 in eukaryotic cells whilst others are uncharacterized. We compared the expression of Ank and TPR genes  
253 in Karp and UT176. *ank2*, *ank3*, *ank12*, *tpr6*, and *tpr8* were up-regulated with a logFC >1.5 in UT176,

254 while *ank16*, *ank17*, *ak20*, and *tpr1* were up-regulated with a logFC >1.5 in Karp. Most of these proteins  
255 were not detected in the Karp proteomics dataset suggesting that either the mRNAs were not translated,  
256 or that the proteins were secreted and lost during purification. The protein products of all of these *ank*  
257 genes localise to the endoplasmic reticulum or host cell cytoplasm when ectopically expressed<sup>63</sup>. Ank6  
258 interferes with NFκB translocation to the nucleus and inhibits its transcriptional activation<sup>64</sup>. The activity  
259 of the other differentially expressed Anks is not known. Given that these effector proteins interact directly  
260 with host cell proteins we expect that this differential expression will lead to downstream differences in  
261 host response.

262

### 263 **Karp and UT176 induce a type-I interferon proinflammatory response**

264 The transcriptional profile of HUVEC cells infected with Karp or UT176 showed a clear core response to  
265 Ot (Fig. 5A, red), with smaller gene sets responding specifically to a single strain (Fig. 5A purple and  
266 orange). The core response was dominated by a type-I interferon proinflammatory response (Supp. Table  
267 1), seen previously in cultured endothelial cells and monocytes, as well as patient-derived macrophages<sup>13-</sup>  
268 <sup>17</sup>. This is further illustrated by activation of the canonical interferon signaling pathway in response to  
269 Karp (Fig. 5B), with a similar response observed for UT176 (Fig. 5C).

270

271 Host genes commonly up-regulated upon infection with either Ot strain include *IFNB1* (interferon beta)  
272 and genes involved in regulating the type-I interferon response: *IRF9* (interferon-regulated factor 9) and  
273 *STAT1/2*. Interferon-stimulated genes were also up-regulated upon Ot infection, including various  
274 interferon induced proteins with tetratricopeptide repeats (*IFIT*) genes and 2'-5'-oligoadenylate synthase  
275 1 (*OAS1*). In addition to the type-I interferon pathway, the joint Ot response led to up-regulation of

276 proinflammatory chemokine genes including *CXCL10*, *CXCL11*, and for cytokine receptors *IL13RA2*,  
277 *IL7R*, *IL15RA*, and *IL3RA* (Supp. Table 1).

278

279 The upstream signals leading to activation of these signaling pathways are unknown but Ot has been  
280 shown to activate host cells by signaling through the NOD1-IL32<sup>65</sup> and TLR2<sup>66</sup> pathways. Our data  
281 showed that *TLR3* is up-regulated in cultured HUVEC cells in response to both Karp and UT176 (Supp.  
282 Table 1). TLR3 recognizes viral double-stranded (ds)RNA in the cytoplasm<sup>67</sup> and it is possible that it  
283 responds to Ot dsRNA. The up-regulation of the mRNA for transcription factor IRF7, which is known to  
284 respond to stimulation from membrane-bound TLRs, further supports a role for TLR2 and TLR3 in the  
285 detection of Ot.

286

### 287 **Differential host responses to Karp and UT176**

288 Although Karp and UT176 both induced a type-I interferon proinflammatory response compared to  
289 uninfected HUVEC cells (Fig. 5B,C), each strain also induced its own unique response. Some of these  
290 expression changes were validated by qRT-PCR (Supp. Fig. 12). The mRNA levels of multiple cytokines,  
291 chemokines, and cytokine receptors were higher in HUVEC cells infected with UT176 compared with  
292 Karp (Fig. 6A, Supp Fig 14, 15, 17). A network map of proinflammatory chemokines and cytokines, and  
293 their differential induction in response to UT176 and Karp is shown in Fig 6A and Supp. Fig. 14A. Most  
294 of the genes for cytokines, chemokines, and cytokine receptors were differentially up-regulated by  
295 infection with UT176 compared with Karp, including *CXCL8*, *CXCL1*, *CXCL2*, *CXCL10*, *IL6*, *IL1RL1*,  
296 *IL18RI*. The mRNA levels of surface adhesion molecules associated with activation of the endothelium,  
297 VCAM1 and ICAM1, were also up-regulated in UT176 infected cells compared with Karp (Supp. Table  
298 1). Whilst *TLR3* was up-regulated in both strains, TLR3 activation in UT176 infected cells was 1.5 logFC

299 higher than in response to Karp. Comparison of NFkB pathway genes and genes associated with NOS2  
300 production revealed that genes in both pathways were up-regulated in UT176 but they were not up-  
301 regulated or were significantly less up-regulated in response to Karp infection (Supp. Fig. 15). Expression  
302 of host genes associated with leukocyte proliferation and mononuclear leukocyte differentiation was  
303 strongly induced in HUVECs infected with UT176 but significantly less so when infected with Karp  
304 (Supp. Fig. 16). Thus, UT176 seems to induce a stronger proinflammatory response and this may lead to  
305 more effective pathogen clearance (see Fig. 1B).

306  
307 In contrast to the multiple chemokines and cytokines up-regulated in UT176-infected HUVEC cells, only  
308 *IL33* was specifically up-regulated in Karp-infected HUVEC cells (5 logFC difference; Supp. Table 1).  
309 IL33 is a proinflammatory cytokine that is involved in pathogenicity in a mouse model of scrub typhus<sup>68</sup>.  
310 To investigate Karp-mediated activation of *IL33* we analyzed gene induction in the IL33-FAS network  
311 (Fig. 6B/Supp. Fig. 14B). Most genes in the network were differentially induced in Karp-infected HUVEC  
312 cells compared to in UT176-infected HUVECs. Up-regulation of IL33-NOS-mediated signaling  
313 contributes to tissue inflammation. We analyzed networks of genes involved in (i) organismal growth  
314 failure (ii) organismal morbidity and mortality and (iii) organismal death. In all cases Karp induced these  
315 networks whilst UT176 dampened them (Supp. Fig. 17).

316

### 317 **Two Ot strains differ in virulence in a mouse model**

318 To assay the effects of the differential inflammatory responses induced by Karp and UT176 we tested the  
319 relative virulence of the two strains in an intravenous mouse infection model.  $1.25 \times 10^6$  bacteria were  
320 inoculated into outbred ICR mice and monitored for disease symptoms for 12 days prior to euthanasia.  
321 Blood and tissue from lung, liver, spleen, and kidneys were isolated and the bacterial load measured by



322 qPCR. We found that Karp was significantly more virulent than UT176 as determined by disease outcome,  
323 weight loss, bacterial load, and histopathological analysis (Fig. 7, Supp. Fig. 19-21). This difference is  
324 likely to result from a combination of differential bacterial growth rate (Fig. 1B), differential expression  
325 of bacterial virulence related genes (Fig. 4), and differential induction of host immune networks (Fig. 6).  
326  
327

## 328 **Discussion**

329 Both its obligate intracellular lifestyle and the complexity of rearrangements in the Ot genome make it  
330 difficult to study. Ot has a genome of 1.9-2.5 Mbp, almost half of which is composed of repetitive regions  
331 of >1,000 bp in length<sup>8</sup>. This is in contrast to the most closely related rickettsial species, whose genomes  
332 are typically around 1.1-1.3 Mbp<sup>69</sup>. The Ot genome is remarkably unstable, which makes inference of its  
333 transcriptional architecture particularly difficult. Using RNA-seq, we were able to identify core ncRNAs,  
334 putative sRNAs, and operonic transcripts. In sharp contrast to most bacteria, only a handful of operons  
335 containing more than 2 or 3 genes were conserved between Karp and UT176, and these primarily encode  
336 for proteins involved in core cellular processes like respiration and translation. Given that Karp encodes  
337 only 12 predicted transcription factors and 3 sigma factors, in contrast to 300 and 7, respectively, in *E.*  
338 *coli*, this raises the question of how transcription in Ot is coordinated.

339  
340 One possible explanation is that much Ot transcription is not stringently controlled, and alternative  
341 mechanisms have arisen in Ot to control protein expression. This is supported in part by our observation  
342 that protein expression is partially predicted by antisense transcription. This mode of regulation seems to  
343 be particularly prevalent for genes encoded by the RAGE, a transposable element of the integrative and  
344 conjugative element group. Transposable element regulation by antisense transcripts was one of the  
345 earliest discovered examples of riboregulation<sup>71</sup>, though it has not previously been observed at the scale  
346 implied by our RNA-seq analysis. Such antisense regulation could arise spontaneously through capture of  
347 transcriptional noise, providing a parsimonious alternative to transcriptional control<sup>72</sup>. It is unclear  
348 whether these untranslated transcripts have some function in Ot, or whether they are purely selfish DNA  
349 elements that Ot has been unable to dispose of due to its small population size. One intriguing possibility

350 is that this regulatory mechanism would provide a large pool of double stranded RNA upon intracellular  
351 bacterial lysis, which may explain Ot induction of TLR3 and an antiviral immune response.

352

353 In the absence of genetic tools it is difficult to identify specific genes that drive virulence differences  
354 between UT176 and Karp. However, comparative genomics has revealed that whilst the pan genome of  
355 Ot is open, it is largely composed of gene duplications rather than newly acquired genes. This lack of gene  
356 novelty likely reflects the environmental isolation associated with an obligate intracellular lifestyle.  
357 Consequently, strain-specific differences in virulence are likely to be driven largely by differences in  
358 relative gene expression rather than the presence or absence of virulence genes. Consistent with this, we  
359 observed an up-regulation of virulence-associated surface proteins in Karp compared with UT176.

360

361 The inflammatory response triggered by Ot infection is a key driver of virulence in scrub typhus. We  
362 compared the response of endothelial cells to the two strains of Ot and found that differential activation  
363 of the immune response correlated with differential outcomes in a scrub typhus mouse model. Whilst both  
364 Karp and UT176 induced an antiviral proinflammatory response, as shown previously<sup>13-17</sup>, UT176  
365 strongly induced an IL6-mediated pro-inflammatory response whilst Karp induced an IL33-NOS3-FAS  
366 response, differences likely to influence the relative virulence of these strains.

367

368 *IL33* was one of the most strongly differentially regulated genes between UT176 and Karp infections (5.1  
369 logFC higher in Karp-infected HUVECs). IL33 has previously been shown to play a role in pathogenesis  
370 in a scrub typhus murine model, using the Karp strain, where it was shown that IL33 levels were increased  
371 during Ot infection, that *IL33*<sup>-/-</sup> mice showed less severe disease symptoms, and that addition of rIL33

372 increased severity and mortality<sup>68</sup>. Our observations of reduced induction of *IL33* by the less virulent  
373 UT176 strain further support a role for this cytokine in the pathogenesis of scrub typhus.

374

375 In summary, we have used dual RNA-seq to gain insights into the transcriptome structure and mechanisms  
376 of gene regulation in the neglected intracellular pathogen *Ot* during infection. We provide evidence for  
377 widespread antisense regulation, in particular for the RAGE genes. We identified a relationship between  
378 the relative induction of IL33- and IL6-based gene networks in the host and disease severity. These  
379 findings will lay the groundwork for subsequent studies on the regulation of gene expression in *Ot* and  
380 mechanisms of pathogenesis. More generally, the present study may serve as a blueprint for the  
381 characterization of further obligate intracellular, genetically intractable bacterial pathogens.

382

383 **Figure legends**

384 **Figure 1. Overview.** **A.** Schematic experimental overview. HUVEC = human umbilical vein endothelial  
385 cell. **B.** Growth curve showing replication of Ot in cultured HUVEC cells. Bacteria were grown in 24 well  
386 plates and the total bacteria per well is shown. Mean and SD from three independent replicates are shown.  
387 **C.** Confocal microscopy images of Ot in HUVEC cells 5 days post infection. Additional images and time  
388 points are shown in Supp. Fig. 1 and 2. Blue = DAPI (DNA), Red = Evans blue (host cells), green = Ot  
389 labelled with Alexa488-click-methionine. **D.** RNA mapping statistics showing the fraction of host and Ot  
390 RNA for each condition. The first replicate of the experiment is shown. Individual results for each replicate  
391 are shown in Supp. Fig. 3. **E.** Percentage of RNA-seq reads assigned to different classes of RNA in Karp,  
392 UT176 and HUVEC.

393

394 **Figure 2. RNA biology in Ot.** **A.** Northern blot analysis of core non-coding RNAs in Ot. **B.** Structure of  
395 the two-piece tmRNA observed in the Ot transcriptome **C.** RNA-seq read coverage over the tmRNA gene  
396 mirrors cleavage observed by Northern blot. **D.** A comparison of genomic synteny of two species within  
397 the enterobacteriaceae (*Escherichia coli* MG1655 and *Salmonella enterica* serovar Typhimurium SL1344,  
398 top), with synteny between the two *Orientia* strains from this study (bottom). **E.** Pie charts illustrating the  
399 relative abundance of RAGE genes in conserved (top) and strain-specific (bottom) operons. **F.**  
400 Visualization of the largest conserved operon in Ot, encoding multiple ribosomal genes, showing RNA-  
401 seq coverage in both strains.

402

403 **Figure 3. Antisense transcription is enriched on mobile genetic elements and is predictive of an**  
404 **absence of protein expression.** **A. B.** Plot showing the relationship between protein expression, defined  
405 by LFQs, and transcript expression, defined by TPMs. Genes cluster into two groups based on their protein

406 expression. The red line indicates the threshold for expressed genes (TPM value equal to 10). **C.** Sense  
407 transcription and the ratio of reads assigned to the antisense and sense strands, showing classification  
408 based on proteomics detection. The red line indicates the sense-antisense ratio (1.059182) above which  
409 translation was not detected by mass spectrometry. **D.** ROC curves evaluating the performance of logistic  
410 regression models to predict protein expression from RNA-seq read counts. Model 1 strictly uses sense  
411 expression, Model 2 the antisense-sense ratio, and Model 3 uses both. Incorporating antisense expression  
412 clearly improves model performance. **E.** Fraction of core genes and RAGE genes in the set of genes with  
413 high antisense-sense ratios, compared to all expressed genes.

414

415 **Figure 4. Differential bacterial gene expression.** **A.** Heatmap illustrating pathways enriched in  
416 differentially expressed genes. All illustrated categories are more highly expressed in Karp. **B.** Volcano  
417 plot showing the differential expression of bacterial genes in Karp and UT176. Bacterial surface genes  
418 (red) and ankyrin repeat-containing effector proteins (blue) with log fold change  $\geq 1$  are highlighted.

419

420 **Figure 5. Ot induces an antiviral interferon response in HUVECs.** **A.** Summary of the host response  
421 showing joint and strain specific responses. The joint response is defined as genes with a logFC  $> 2$  and  
422 FDR-corrected p-value  $< 0.01$  for infection with both Karp and UT176. Strain-specific responses are genes  
423 with a logFC  $> 2$  and FDR-corrected p-value  $< 0.01$  for infection with either Karp or UT176, excluding  
424 genes already included in the joint response. **B.** Activation of multiple genes in the canonical interferon  
425 signaling pathway in Karp infected HUVECs compared with uninfected HUVEC cells. **C.** Heat map  
426 showing up-regulation of genes in the interferon signaling pathway in HUVEC cells infected with Karp  
427 and UT176 compared with uninfected cells.

428

429 **Figure 6. Karp and UT176 lead to the up-regulation of distinct networks in HUVECs. A.** Up-  
430 regulation of multiple proinflammatory chemokines and cytokines in HUVECs infected with UT176. **B.**  
431 Induction of the IL33-FAS-mediated anoikis network in Karp infected HUVECs.

432

433 **Figure 7. Karp is more virulent than UT176 in a mouse infection model. A.** Weight change over 12  
434 days of infection. **B.** Clinical observation score of mice 12 days post-infection. This number is a composite  
435 score based on appetite, activity, and hair coat with higher numbers representing low appetite, low activity,  
436 and ruffled fur. Details provided in Supp. Fig. 20. **C.** Bacterial copy number in 100  $\mu$ l blood taken from  
437 euthanized mice 12 days post-infection, measured by qPCR. **D.** The ratio of bacterial DNA copy number  
438 to mouse DNA copy number in lung, liver, spleen, and kidney of euthanized mice 12 days post-infection,  
439 measured by qPCR. **E.** Lesion scores of Hematoxylin and Eosin stained lung, liver, spleen, and kidneys  
440 of euthanized mice 12 days post infection. Scores range from 0 to 5 with 0 representing normal tissue and  
441 5 representing severe lesion damage. All graphs show mean and standard deviation. Statistical significance  
442 is calculated using unpaired Student t-test in GraphPad Prism software. \*\* $p \leq 0.01$  \*\*\* $p \leq 0.001$   
443 \*\*\*\* $p \leq 0.0001$  **F.** Images of Hematoxylin and Eosin stained lung tissue of mice infected with buffer,  
444 UT176 or Karp. Scale bars = 50  $\mu$ m. \* indicates airway and \*\* indicates blood vessel. Uninfected control:  
445 airway, blood vessel and alveoli all appear normal. UT176-infected lungs: There are diffuse thickening  
446 and infiltration of alveolar septa with a mixed population of macrophages and lymphocytes (arrows).  
447 There is also mild perivascular lymphohistiocytic inflammation (open arrow). Karp-infected lungs: There  
448 is diffuse moderate thickening and infiltration of alveolar septa with a mixed population of macrophages  
449 and lymphocytes. The airway (\*) is unaffected and normal. Additional figures are shown in Supp. Fig.  
450 20.

451





## 453 **Materials and Methods**

### 454 **Growth of Ot and isolation of RNA**

455 The clinical isolate strains (Karp and UT176) of *Orientia tsutsugamushi* were propagated in a confluent  
456 monolayer of host cells (HUVEC, Human Umbilical Vein Endothelial Cells; ATCC PCS-100-010) for 5  
457 days at MOI 100:1. Cells were cultured using Media200 (Thermo Fisher, Catalog no. M200-500)  
458 supplemented with LVES media (Thermo Fisher, Catalog no. A14608-01) at 35 °C and 5% CO<sub>2</sub>. The  
459 infectivity was determined by qPCR of the single copy Ot gene *47kDa* at day 5-7. Both uninfected cells  
460 and infected cells were harvested by incubating the cells on ice and quickly resuspending in RNAprotect  
461 Bacteria Reagent (Qiagen, catalog no. 76506), then storing at -80 °C until use. RNA extraction was  
462 performed using the Qiagen RNeasy Plus kit (Qiagen, catalog number 74136) according to manufacturer's  
463 instructions and as described previously (Atwal, 2017).

464

### 465 **RNA processing and sequencing**

466 The integrity of the DNase-treated RNA samples was assessed in a Bioanalyzer (Agilent). All samples  
467 had RIN (RNA integrity number) values  $\geq 8.0$ . Ribosomal transcripts were removed using the Ribo-Zero  
468 Gold (epidemiology) kit (Illumina). Following the manufacturer's instructions, 500 ng of total, DNase-  
469 treated RNA was used as an input to the ribo-depletion procedure. rRNA-depleted RNA was precipitated  
470 in ethanol for 3 h at -20°C.

471 cDNA libraries for Illumina sequencing were generated by Vertis Biotechnologie AG, Freising-  
472 Weihenstephan, Germany. rRNA-free RNA samples were first sheared via ultrasound sonication (four 30-  
473 s pulses at 4°C) to generate on average 200- to 400-nt fragments. Fragments of 20 nt were removed using  
474 the Agencourt RNAClean XP kit (Beckman Coulter Genomics) and the Illumina TruSeq adapter was  
475 ligated to the 3' ends of the remaining fragments. First-strand cDNA synthesis was performed using M-

476 MLV reverse transcriptase (NEB) wherein the 3' adapter served as a primer. The first-strand cDNA was  
477 purified, and the 5' Illumina TruSeq sequencing adapter was ligated to the 3' end of the antisense cDNA.  
478 The resulting cDNA was PCR-amplified to about 10 to 20 ng/ $\mu$ l using a high fidelity DNA polymerase.  
479 The TruSeq barcode sequences were part of the 5' and 3' TruSeq sequencing adapters. The cDNA library  
480 was purified using the Agencourt AMPure XP kit (Beckman Coulter Genomics) and analyzed by capillary  
481 electrophoresis (Shimadzu MultiNA microchip).  
482 For sequencing, cDNA libraries were pooled in approximately equimolar amounts. The cDNA pool was  
483 size fractionated in the size range of 200 to 600 bp using a differential cleanup with the Agencourt AMPure  
484 kit (Beckman Coulter Genomics). Aliquots of the cDNA pools were analyzed by capillary electrophoresis  
485 (Shimadzu MultiNA microchip). Sequencing was performed on a NextSeq 500 platform (Illumina) at  
486 Vertis Biotechnologie AG, Freising-Weihenstephan, Germany (single-end mode; 75 cycles).

487

#### 488 **Northern blots**

489 Each 15  $\mu$ g of total RNA (i.e. a mixture of human and Ot RNA) prepared as above were loaded per lane  
490 and separated in 6% (vol/vol) polyacrylamide–7 M urea gels. Blotting was performed as previously  
491 described<sup>24</sup>. After the transfer onto Hybond XL membranes (Amersham), RNA was cross-linked with UV  
492 light and hybridized at 42°C with gene-specific 32P-end-labeled DNA oligonucleotides (Supp. Fig. 13)  
493 in Hybri-Quick buffer (Carl Roth AG). After exposure, the screens were read out on a Typhoon FLA 7000  
494 phosphorimager (GE Healthcare).

495

#### 496 **qRT-PCR**

497 qRT-PCR was performed with the Power SYBR Green RNA-to-CT1-Step kit (Applied Biosystems)  
498 according to the manufacturer's instructions and a CFX96 Touch real-time PCR detection system (Bio-

499 Rad). Human U6 snRNA served as reference transcripts. Fold changes in expression were determined  
500 using the  $2^{(-\Delta\Delta Ct)}$  method <sup>76</sup>. Primer sequences are given in Supp. Fig. 13, and their specificity had been  
501 confirmed using Primer-BLAST (NCBI).

502

### 503 **RNA seq read processing and quantification**

504 The raw reads were initially processed according to our established dual RNA-seq pipeline<sup>24</sup>. Briefly, raw  
505 reads were trimmed for adaptor sequences and a minimum read quality of 20 using cutadapt<sup>77</sup>. Reads were  
506 then mapped against the human (GRCh38) and Ot (UT176 accession: LS398547.1; Karp accession:  
507 LS398548.1) reference sequences using the READemption pipeline (v0.4.3, <sup>78</sup>) and segemehl with the  
508 lack remapper (v0.2.0 <sup>79</sup>), removing reads that mapped equally well to the bacterial and host genomes. For  
509 downstream analysis of human gene expression, only uniquely mapping reads were retained for  
510 quantification.

511 To improve quantification of repetitive sequences, reads mapped to the Ot genomes were used for  
512 quantification of bacterial transcript expression using Salmon (v0.9.1) <sup>29</sup>. Salmon is a quasi-mapping  
513 based gene expression quantification tool that consists of two steps, indexing and quantification.

514 Transcript fasta files were created from the Genbank annotations using the gene coordinates. The indexing  
515 step was performed in quasi-mapping mode (--type quasi). Expression of the transcripts was quantified  
516 using both stranded forward library type (-lSF) and removing incompatible mappings (--incompatPrior  
517 0.0). Salmon identified identical gene repeats that are collected in 218 groups (see supplementary table,  
518 Karp groups of duplicates). For quantification purposes we retained a single gene from each group.

519 For the purposes of summarizing gene expression, we calculated mean TPM values from three replicates  
520 for each strain. Genes with a mean TPM greater than 10 were classified as expressed, and those with a  
521 mean TPM value greater than 50 highly expressed.

522

### 523 **Gene annotation**

524 For each gene we retrieved the gene name, gene product, and amino acid sequence from the Genbank  
525 annotation. In addition, using eggNOG-mapper<sup>10</sup> we predicted gene names and both KEGG pathways<sup>11</sup>  
526 and GO terms. We manually identified surface antigen encoding proteins using BLAST. The KEGGREST  
527 (Tenenbaum, D (2019) KEGGREST: Client-side REST access to KEGG. R package version 1.18.1.) and  
528 GO.db (Carlson M (2019). GO.db: A set of annotation maps describing the entire Gene Ontology. R  
529 package version 3.5.0.) R packages were used to retrieve KEGG and GO terms, respectively.

530

### 531 **Non-coding RNA prediction**

532 Noncoding RNAs were annotated using Rockhopper<sup>76</sup>, ANNOgesic<sup>77</sup> (v0.7.17) and Infernal<sup>78</sup> (v1.1.2)  
533 searching sequences against the Rfam database<sup>79</sup>. These provided inconsistent predictions of intergenic  
534 sRNAs. Intergenic sRNAs were manually curated by visual comparison of the predicted sRNA  
535 coordinates with the read coverage in the Integrative Genomics Viewer<sup>80</sup> (v2.5.2). Infernal predicted the  
536 core housekeeping ncRNAs tmRNA, RNaseP, SRP and 5S rRNA. The quantification of the bacterial  
537 transcriptomes complemented with predicted sRNAs was performed using Salmon.

538

### 539 **Genomic alignment**

540 Genomic comparisons in Figure panels D and F were performed using Easyfig<sup>81</sup>. Escherichia coli K-12  
541 MG1655 (Accession number U00096) and Salmonella enterica serovar Typhimurium SL1344 (Accession  
542 number FQ312003) were used as comparators for synteny analysis.

543

#### 544 **Orthology and conserved operon prediction**

545 We predicted orthologous genes between the two *Orientia* strains using Poff<sup>82</sup> with default parameters in  
546 synteny mode. To identify conserved operons we used operon structures predicted in each strain by  
547 Rockhopper<sup>41</sup>. Based on visual analysis of read coverage in the Integrative Genomics Viewer, some of  
548 the operons were manually extended by addition of genes or merging two operons into one. We also  
549 identified partially conserved operons missing some genes in one strain.

550

#### 551 **Differential gene expression**

552 For the bacteria, differential gene expression analysis was performed between orthologous genes  
553 identified by Poff. Genes that were predicted as an orthologous group (more than two genes) were  
554 removed from the analysis. Additionally, we removed duplicates (transcripts with perfectly identical  
555 sequence) that were identified by Salmon in either strain. For both human and bacterial RNA-seq data, we  
556 performed differential gene expression analysis with the edgeR package<sup>83</sup> (v3.20.9) using robust quasi-  
557 likelihood estimation<sup>84</sup>, including genes with CPM (Counts Per Million) > 10 (for Ot) or CPM > 1 (for  
558 HUVEC) in at least 3 libraries. To identify biological processes that differ between two *Orientia* strains,  
559 we have performed gene set analysis using KEGG and GO terms that contain at least 4 expressed genes  
560 using the fry test in the edgeR package.

561

#### 562 **Proteomic sample preparation**

563 Bacteria were propagated in HUVEC cell line at MOI 100:1 and harvested at 5 dpi. Ot was isolated,  
564 washed with 0.3 M sucrose, and lysed with 1% triton-X prior to acetone precipitation of protein. Total

565 protein was then alkylated, reduced, and subsequently treated with Lys-C/Trypsin. Digested peptides were  
566 desalted using Oasis® HLB reversed-phase cartridges, vacuum dried, and stored for MS runs.

567

### 568 **Mass spectrometry**

569 The dried samples were resuspended of 2% (v/v) acetonitrile solution containing 0.06% (v/v)  
570 trifluoroacetic acid and 0.5% (v/v) acetic acid and loaded onto an autosampler plate. Online  
571 chromatography was performed using EASY-nLC 1000 (Thermo Scientific) in single-column setup using  
572 0.1% formic acid in water and 0.1% formic acid in acetonitrile as mobile phases. using reversed-phase  
573 C18 column (EASY-Spray LC Column, 75 µm inner diameter x 50 cm, 2 µm particle size) (Thermo  
574 Scientific). The samples were injected and separated on the analytical column maintained at 50 °C using  
575 a 2–23% (v/v) acetonitrile gradient over 60 min, then ramped to 50% over the next 20 min, and finally to  
576 90% within 5 min. The final mixture was maintained for 5 min to elute all remaining peptides. Total run  
577 duration for each sample was 90 min at a constant flow rate of 300 nl/min.

578 Data was acquired using an Orbitrap Fusion mass spectrometer (Thermo Scientific) in data-dependent  
579 mode. Samples were ionized 2.5 kV and 300 °C at the nanospray source and positively-charged precursor  
580 MS1 signals were detected using an Orbitrap analyzer set to 60,000 resolution, automatic gain control  
581 (AGC) target of 400,000 ions, and maximum injection time (IT) of 50 ms. Precursors with charges 2–7  
582 and having the highest ion counts in each MS1 scan were further fragmented using collision-induced  
583 dissociation (CID) at 35% normalized collision energy and their MS2 signals were analyzed by ion trap  
584 at an AGC of 10,000 and maximum IT of 35 ms. Precursors used for MS2 scans were excluded for 90 s  
585 in order to avoid re-sampling of high abundance peptides. The MS1-MS2 cycles were repeated every 3 s  
586 until completion of the run.

587 Identification of proteins within each sample was performed using MaxQuant (v1.5.5.1). Raw mass  
588 spectra were searched against *Orientia tsutsugamushi* primary protein sequences derived from complete  
589 genome data. Human whole proteome sequences were obtained from Uniprot and included as background.  
590 Carbamidomethylation on Cys was set as the fixed modification and acetylation on protein N-terminus  
591 and oxidation of Met were set as dynamic modifications for the search. Trypsin was set as the digestion  
592 enzyme and was allowed up to 3 missed cleavage sites. Precursors and fragments were accepted if they  
593 had a mass error within 20 ppm. Peptides were matched to spectra at a false discovery rate (FDR) of 1%  
594 against the decoy database.

595

### 596 **Proteomic data analysis**

597 Protein expression was measured by label free quantification values (LFQs). A protein was classified as  
598 detected if at least two peptides were detected in at least 2 biological replicates, and the mean LFQ across  
599 the three replicates was used for further analysis. Otherwise the protein was classified as undetected, and  
600 the LFQ value was set to zero. The proteomic data includes 19 protein groups that couldn't be resolved,  
601 consisting of 93 proteins. In our analysis we discarded these proteins to simplify the analysis.

602

### 603 **Transcript classification**

604 Sense transcript expression was defined by mean TPM value across replicates. The antisense/sense ratio  
605 was calculated as the ratio of mean read counts assigned to the antisense and sense strand of coding  
606 annotations. The duplicated sequences identified by Salmon (Supp. Table 1. Karp groups of duplicates)  
607 and non-coding RNAs were removed from the analysis.

608

609 We divided the data set into two classes, detected and undetected in proteomics. Within our analyzed data  
610 set, 322 genes were detected, whereas 1608 genes were not detected by mass spectrometry. We found a  
611 weak positive correlation between TPMs and LFQs for genes with detected proteins (Spearman's  
612 correlation coefficient equal to 0.32), but it was not a linear association (Pearson's correlation coefficient  
613 equal to 0.04). For the further analysis we selected transcripts with sense expression greater than 10 TPMs,  
614 previously defined as our expression threshold.

615

### 616 **Logistic Regression model**

617 To test whether antisense-sense ratios are predictive of protein expression, we have applied logistic  
618 regression, which models the probability of a binary response, that is, whether a protein is expressed or  
619 not. We have built 3 competing models. Model 1 makes predictions of the protein expression based solely  
620 on sense transcription:

621

$$622 \beta_0 + \beta_1 * (\text{TPM sense})$$

623

624 Model 2 makes predictions solely on the antisense-sense ratio:

625

$$626 \beta_0 + \beta_1 * ((\text{number of antisense reads}) / (\text{number of sense reads}))$$

627

628 Model 3 uses both sense transcription and the antisense-sense ratio to make predictions:

629

$$630 \beta_0 + \beta_1 * (\text{TPM sense}) + \beta_2 * ((\text{number of antisense reads}) / (\text{number of sense reads}))$$

631



632 Since the data is highly imbalanced, 295 transcripts with detected proteins, and 814 without, we used a  
633 downsampling procedure (downSample function) implemented in the caret R package<sup>85</sup> to create a  
634 balanced data set for model training purposes. Next, the function glm() with a logit link function from the  
635 caret package was used to fit models to the reduced data set. For a first indication as to whether any of  
636 these models are predictive, we trained all three models on a downsampled data set consisting of 590  
637 genes, then tested them on the complete data set. To more rigorously assess this result, we have applied  
638 500-fold cross validation. For each fold the data was split randomly into 2 data sets, training and testing  
639 which included 1055 and 54 genes, respectively. Each time the new training data set was reduced to 562  
640 genes, which were used to estimate the model parameters, and then the model was evaluated on the testing  
641 data set. The model performance was evaluated using a variety of measures, i.e. sensitivity, specificity,  
642 accuracy (caret R package) as well as with ROC curves<sup>86</sup> (pROC 1.14.0) and the area under the ROC  
643 curve (AUC).

644

#### 645 **Immunofluorescence microscopy**

646 The protocol for L-Homopropargylglycine (HPG) incorporation, click chemistry and fluorescence  
647 detection were based on recommendations from Click-iT® HPG Alexa Fluor® Protein Synthesis Assay  
648 Kits (Molecular probe by Life Technologies). HUVECs were grown on chambered coverslip slides (Ibidi,  
649 USA), for 2 days before infection with bacteria at MOI 100:1. To incorporate HPG at times indicated,  
650 medium was removed and replaced with L-methionine-free medium (Dulbecco's Modified Eagle  
651 Medium, DMEM, Cat. no. 21013) containing 25  $\mu$ M HPG for 30 min at 37 °C. Labeled bacteria were  
652 washed twice in 1X PBS+ 1mg/ml BSA, pH 7.4 before fixing with 4% formaldehyde and subsequently  
653 being permeabilized with 0.5% TritonX for 20 min on ice. After washing with PBS + 1 mg/ml BSA, the  
654 Click-iT® reaction cocktail (Click-iT® HPG Alexa Fluor® Protein Synthesis Assay Kits cat. C10428)

655 was incubated with cells for 30 min at room temperature in the dark. The Azide dye (Alexa Fluor®488)  
656 was used at a final concentration of 5  $\mu$ M. After the click reaction, cells were labeled with the actin probe  
657 Alexa Fluor® 594 phalloidin at a dilution of 1:40 and the nuclear stain Hoechst diluted to 1:1000 for 30  
658 min at 37 °C. Cells were washed 3X with PBS which was replaced with mounting media after the final  
659 wash. Imaging was performed using a Zeiss LSM 7000 equipped with a 63  $\times$  1.4 NA objective lens (Carl  
660 Zeiss, USA) and also a Leica SP8 laser scanning confocal microscope.

661

### 662 **Analysis of codon bias**

663 We calculated the RSCU (relative synonymous codon usage) for each codon to quantify genome-wide or  
664 gene-specific codon usage bias following<sup>52</sup>. To determine the genomic codon counts for each species and  
665 gene set, we parsed nucleotide sequence data and annotation in the GenBank file format, downloaded  
666 from the NCBI database. We also obtained tRNA gene copy numbers from the GtRNAdb database<sup>87,88</sup>,  
667 and integrated protein abundance for E. coli K-12 MG1655 data from PaxDB 89.

668

### 669 **Host Network/Pathway analysis**

670 To identify pathways that are affected in Karp and/or UT176 infected host cells, genes differentially  
671 expressed with an adjusted p-value of  $< 0.05$  were analyzed using Ingenuity Pathway Analysis (IPA)  
672 software (Ingenuity® Systems, Inc. Redwood City, CA)<sup>81</sup> as described previously<sup>82</sup>. Selected pathways  
673 were chosen based on enrichment p-values and activation Z-scores, and served as the basis for Figs 5, 6,  
674 and Supp. Fig. 11, 14, 15, 16, and 17.

675

### 676 **Mice and Ethics statement**

677 All animal research was performed strictly under approved Institutional Animal Care and Use Committee  
678 (IACUC) protocol by the IACUC and Biosafety Review Committee at the Armed Forces Research  
679 Institute of Medical Sciences (AFRIMS) Bangkok, Thailand, an AAALAC International-accredited  
680 facility. The protocol number was PN16-05. The animal research was conducted in compliance with Thai  
681 laws, the Animal Welfare Act, and all applicable U.S. Department of Agriculture, Office of Laboratory  
682 Animal Welfare and U.S. Department of Defense guidelines. All animal research adhered to the Guide for  
683 the Care and Use of Laboratory Animals, NRC Publication (8<sup>th</sup> Edition).  
684 C57BL/6NJcl mice were purchased from Nomura Siam International, Bangkok, Thailand. Mice were  
685 housed in an animal biosafety level 2 facility and moved to an animal biosafety level 3 containment 2 days  
686 before the inoculation. Mice at 6- 8 weeks of age were used in these experiments. Two group of mice (n  
687 =8 per group) were intravenously injected in the tail vein with  $1.25 \times 10^6$  genome copies of *O.*  
688 *tsutsugamushi* of either Karp strain or UT176 strain. The *O. tsutsugamushi* inoculum was derived from  
689 *O. tsutsugamushi*-infected L929 cells. Clinical signs and body weight were evaluated daily. After 12 days  
690 post inoculation, all mice were euthanized. Blood and tissue samples including lungs, liver, spleen, and  
691 kidneys were collected for bacteria quantification and histopathology.

692

693

694

695

696 **Acknowledgements**

697 JS is funded by a Royal Society Dorothy Hodgkin Research Fellowship (DH140154) and this project was  
698 additionally funded by a grant from the University of Oxford Medical Sciences Division Medical Research  
699 Fund. The authors are grateful to Guy Riddihough from Life Science Editors for editorial support on this  
700 manuscript. The authors would like to thank Sandy Pernitzsch/Scigraphix for assistance with Figures 5  
701 and 6.

702

703

704 **Author contributions**

705 Conceptualization, J.V., L.B., J.S.; Investigation, B.M.G., S.G., A.J.W., J.W., S. C., L.C.W., P.S., L.B.;  
706 Formal Analysis, B.M.G., W.K.C., S.S., R.S., L.B.; Resources, R.S., J.V., L.B., J.S.; Writing – Original  
707 Draft, L.B., J.S.; Writing – Review and Editing, A.J.W., L.B., J.S.; Supervision, L.B., J.S.; Funding  
708 Acquisition, J.V., J.S.

709

710 **Competing interests**

711 The authors declare no competing interests.

712

713

714

715 **References**

- 716 1. Luce-Fedrow, A., Lehman, M., Kelly, D., Mullins, K., Maina, A., Stewart, R., Ge, H., John, H.,  
717 Jiang, J. & Richards, A. A Review of Scrub Typhus (*Orientia tsutsugamushi* and Related  
718 Organisms): Then, Now, and Tomorrow. *Tropical Medicine and Infectious Disease* **3**, 8 (2018).
- 719 2. Izzard, L., Fuller, A., Blacksell, S. D., Paris, D. H., Richards, A. L., Aukkanit, N., Nguyen, C.,  
720 Jiang, J., Fenwick, S., Day, N. P., Graves, S. & Stenos, J. Isolation of a novel *Orientia* species (*O.*  
721 *chuto* sp. nov.) from a patient infected in Dubai. *J Clin Microbiol* **48**, 4404-4409 (2010).
- 722 3. Weitzel, T., Dittrich, S., López, J., Phuklia, W., Martinez-Valdebenito, C., Velásquez, K.,  
723 Blacksell, S. D., Paris, D. H. & Abarca, K. Endemic Scrub Typhus in South America. *N Engl J*  
724 *Med* **375**, 954-961 (2016).
- 725 4. Paris, D. H., Phetsouvanh, R., Tanganuchitcharnchai, A., Jones, M., Jenjaroen, K., Vongsouvath,  
726 M., Ferguson, D. P., Blacksell, S. D., Newton, P. N., Day, N. P. & Turner, G. D. *Orientia*  
727 *tsutsugamushi* in human scrub typhus eschars shows tropism for dendritic cells and monocytes  
728 rather than endothelium. *PLoS Negl Trop Dis* **6**, e1466 (2012).
- 729 5. Moron, C. G., Popov, V. L., Feng, H. M., Wear, D. & Walker, D. H. Identification of the target  
730 cells of *Orientia tsutsugamushi* in human cases of scrub typhus. *Mod Pathol* **14**, 752-759 (2001).
- 731 6. Cho, N. H., Kim, H. R., Lee, J. H. & Kim, I. S. The *Orientia tsutsugamushi* genome reveals  
732 massive proliferation of conjugative type IV secretion system and host– cell interaction genes.  
733 *PNAS* **104**, 7981-7986 (2007).
- 734 7. Nakayama, K., Yamashita, A., Kurokawa, K., Morimoto, T., Ogawa, M., Fukuhara, M., Urakami,  
735 H., Ohnishi, M., Uchiyama, I., Ogura, Y., Ooka, T., Oshima, K., Tamura, A., Hattori, M. &  
736 Hayashi, T. The Whole-genome sequencing of the obligate intracellular bacterium *Orientia*  
737 *tsutsugamushi* revealed massive gene amplification during reductive genome evolution. *DNA Res*  
738 **15**, 185-199 (2008).
- 739 8. Batty EM, C. S., Blacksell SB, Richards A, Paris D, Bowden R, Chan C, Lachumanan R, Day N,  
740 Donnelly P, Chen SL, Salje J. Long-read whole genome sequencing and comparative analysis of six  
741 strains of the human pathogen *Orientia tsutsugamushi*. *Plos Negl Trop Dis* (2018).
- 742 9. Kelly, D. J., Fuerst, P. A., Ching, W. M. & Richards, A. L. Scrub typhus: the geographic  
743 distribution of phenotypic and genotypic variants of *Orientia tsutsugamushi*. *Clin Infect Dis* **48**  
744 **Suppl 3**, S203-30 (2009).
- 745 10. Premaratna, R., Blanton, L. S., Samaraweera, D. N., de Silva, G. N., Chandrasena, N. T., Walker,  
746 D. H. & de Silva, H. J. Genotypic characterization of *Orientia tsutsugamushi* from patients in two  
747 geographical locations in Sri Lanka. *BMC Infect Dis* **17**, 67 (2017).
- 748 11. Varghese, G. M., Janardhanan, J., Mahajan, S. K., Tariang, D., Trowbridge, P., Prakash, J. A.,  
749 David, T., Sathendra, S. & Abraham, O. C. Molecular Epidemiology and Genetic Diversity of  
750 *Orientia tsutsugamushi* from Patients with Scrub Typhus in 3 Regions of India. *Emerg Infect Dis*  
751 **21**, 64-69 (2015).
- 752 12. James, S. L., Blacksell, S. D., Nawtaisong, P., Tanganuchitcharnchai, A., Smith, D. J., Day, N. P.  
753 & Paris, D. H. Antigenic Relationships among Human Pathogenic *Orientia tsutsugamushi* Isolates  
754 from Thailand. *PLoS Negl Trop Dis* **10**, e0004723 (2016).
- 755 13. Cho, N., others & Kim, I. S. Expression of Chemokine Genes in Murine Macrophages Infected  
756 with *Orientia tsutsugamushi*. *infection and Immunity* (2000).
- 757 14. Cho, N. H., Seong, S. Y., Choi, M. S. & Kim, I. S. Expression of chemokine genes in human  
758 dermal microvascular endothelial cell lines infected with *Orientia tsutsugamushi*. *Infect Immun* **69**,  
759 1265-1272 (2001).

- 760 15. Koh, Y. S., Yun, J. H., Seong, S. Y., Choi, M. S. & Kim, I. S. Chemokine and cytokine production  
761 during *Orientia tsutsugamushi* infection in mice. *Microbial pathogenesis* (2004).
- 762 16. Tantibhedhyangkul, W., Prachason, T., Waywa, D., El Filali, A., Ghigo, E., Thongnoppakhun, W.,  
763 Raoult, D., Suputtamongkol, Y., Capo, C., Limwongse, C. & Mege, J. L. *Orientia tsutsugamushi*  
764 stimulates an original gene expression program in monocytes: relationship with gene expression in  
765 patients with scrub typhus. *PLoS Negl Trop Dis* **5**, e1028 (2011).
- 766 17. Tantibhedhyangkul, W., Ben Amara, A., Textoris, J., Gorvel, L., Ghigo, E., Capo, C. & Mege, J.  
767 L. *Orientia tsutsugamushi*, the causative agent of scrub typhus, induces an inflammatory program  
768 in human macrophages. *Microb Pathog* **55**, 55-63 (2013).
- 769 18. Astrup, E., Janardhanan, J., Otterdal, K., Ueland, T., Prakash, J. A., Lekva, T., Strand, O. A.,  
770 Abraham, O. C., Thomas, K., Damas, J. K., Mathews, P., Mathai, D., Aukrust, P. & Varghese, G.  
771 M. Cytokine network in scrub typhus: high levels of interleukin-8 are associated with disease  
772 severity and mortality. *PLoS Negl Trop Dis* **8**, e2648 (2014).
- 773 19. Fukuhara, M., Fukazawa, M., Tamura, A., Nakamura, T. & Urakami, H. Survival of two *Orientia*  
774 *tsutsugamushi* bacterial strains that infect mouse macrophages with varying degrees of virulence.  
775 *Microb Pathog* **39**, 177-187 (2005).
- 776 20. Hanson, B. Comparative susceptibility to mouse interferons of *Rickettsia tsutsugamushi* strains  
777 with different virulence in mice and of *Rickettsia rickettsii*. *Infect Immun* **59**, 4134-4141 (1991).
- 778 21. Sunyakumthorn, P., Paris, D. H., Chan, T. C., Jones, M., Luce-Fedrow, A., Chattopadhyay, S.,  
779 Jiang, J., Anantatat, T., Turner, G. D., Day, N. P. & Richards, A. L. An intradermal inoculation  
780 model of scrub typhus in Swiss CD-1 mice demonstrates more rapid dissemination of virulent  
781 strains of *Orientia tsutsugamushi*. *PLoS One* **8**, e54570 (2013).
- 782 22. Groves, M. G. & Kelly, D. J. Characterization of factors determining *Rickettsia tsutsugamushi*  
783 pathogenicity for mice. *Infect Immun* **57**, 1476-1482 (1989).
- 784 23. Saliba, A. E., C Santos, S. & Vogel, J. New RNA-seq approaches for the study of bacterial  
785 pathogens. *Curr Opin Microbiol* **35**, 78-87 (2017).
- 786 24. Westermann, A. J., Förstner, K. U., Amman, F., Barquist, L., Chao, Y., Schulte, L. N., Müller, L.,  
787 Reinhardt, R., Stadler, P. F. & Vogel, J. Dual RNA-seq unveils noncoding RNA functions in host-  
788 pathogen interactions. *Nature* (2016).
- 789 25. Westermann, A. J., Barquist, L. & Vogel, J. Resolving host-pathogen interactions by dual RNA-  
790 seq. *PLOS Pathog* **13**, (2017).
- 791 26. Humphrys, M. S., Creasy, T., Sun, Y., Shetty, A. C., Chibucos, M. C., Drabek, E. F., Fraser, C.  
792 M., Farooq, U., Sengamalay, N., Ott, S., Shou, H., Bavoil, P. M., Mahurkar, A. & Myers, G. S.  
793 Simultaneous transcriptional profiling of bacteria and their host cells. *PLoS One* **8**, e80597 (2013).
- 794 27. Enatsu, T., Urakami, H. & Tamura, A. Phylogenetic analysis of *Orientia tsutsugamushi* strains  
795 based on the sequence homologies of 56-kDa type-specific antigen genes. *FEMS Microbiol Lett*  
796 **180**, 163-169 (1999).
- 797 28. Paris, D. H., Aukkanit, N., Jenjaroen, K., Blacksell, S. D. & Day, N. P. A highly sensitive  
798 quantitative real-time PCR assay based on the groEL gene of contemporary Thai strains of  
799 *Orientia tsutsugamushi*. *Clin Microbiol Infect* **15**, 488-495 (2009).
- 800 29. Patro, R., Duggal, G., Love, M. I., Irizarry, R. A. & Kingsford, C. Salmon provides fast and bias-  
801 aware quantification of transcript expression. *Nat Methods* **14**, 417-419 (2017).
- 802 30. Withey, J. H. & Friedman, D. I. A salvage pathway for protein structures: tmRNA and trans-  
803 lation. *Annu Rev Microbiol* **57**, 101-123 (2003).
- 804 31. Julio, S. M., Heithoff, D. M. & Mahan, M. J. ssrA (tmRNA) plays a role in *Salmonella enterica*  
805 serovar Typhimurium pathogenesis. *J Bacteriol* **182**, 1558-1563 (2000).

- 806 32. Svetlanov, A., Puri, N., Mena, P., Koller, A. & Karzai, A. W. Francisella tularensis tmRNA system  
807 mutants are vulnerable to stress, avirulent in mice, and provide effective immune protection. *Mol*  
808 *Microbiol* **85**, 122-141 (2012).
- 809 33. Mao, C., Bhardwaj, K., Sharkady, S. M., Fish, R. I., Driscoll, T., Wower, J., Zwieb, C., Sobral, B.  
810 W. & Williams, K. P. Variations on the tmRNA gene. *RNA Biol* **6**, 355-361 (2009).
- 811 34. Keiler, K. C., Shapiro, L. & Williams, K. P. tmRNAs that encode proteolysis-inducing tags are  
812 found in all known bacterial genomes: A two-piece tmRNA functions in Caulobacter. *Proc Natl*  
813 *Acad Sci U S A* **97**, 7778-7783 (2000).
- 814 35. Gaudin, C., Zhou, X., Williams, K. P. & Felden, B. Two-piece tmRNA in cyanobacteria and its  
815 structural analysis. *Nucleic Acids Res* **30**, 2018-2024 (2002).
- 816 36. Sharkady, S. M. & Williams, K. P. A third lineage with two-piece tmRNA. *Nucleic Acids Res* **32**,  
817 4531-4538 (2004).
- 818 37. Storz, G., Vogel, J. & Wassarman, K. M. Regulation by small RNAs in bacteria: expanding  
819 frontiers. *Mol Cell* **43**, 880-891 (2011).
- 820 38. Wagner, E. G. H. & Romby, P. Small RNAs in bacteria and archaea: who they are, what they do,  
821 and how they do it. *Adv Genet* **90**, 133-208 (2015).
- 822 39. Albrecht, M., Sharma, C. M., Dittrich, M. T., Müller, T., Reinhardt, R., Vogel, J. & Rudel, T. The  
823 transcriptional landscape of Chlamydia pneumoniae. *Genome Biol* **12**, R98 (2011).
- 824 40. Dugar, G., Herbig, A., Förstner, K. U., Heidrich, N., Reinhardt, R., Nieselt, K. & Sharma, C. M.  
825 High-resolution transcriptome maps reveal strain-specific regulatory features of multiple  
826 Campylobacter jejuni isolates. *PLoS Genet* **9**, e1003495 (2013).
- 827 41. Kröger, C., Dillon, S. C., Cameron, A. D., Papenfort, K., Sivasankaran, S. K., Hokamp, K., Chao,  
828 Y., Sittka, A., Hébrard, M., Händler, K., Colgan, A., Leekitcharoenphon, P., Langridge, G. C.,  
829 Lohan, A. J., Loftus, B., Lucchini, S., Ussery, D. W., Dorman, C. J., Thomson, N. R., Vogel, J. &  
830 Hinton, J. C. The transcriptional landscape and small RNAs of Salmonella enterica serovar  
831 Typhimurium. *Proc Natl Acad Sci U S A* **109**, E1277-86 (2012).
- 832 42. Sharma, C. M., Hoffmann, S., Darfeuille, F., Reignier, J., Findeiss, S., Sittka, A., Chabas, S.,  
833 Reiche, K., Hackermüller, J., Reinhardt, R., Stadler, P. F. & Vogel, J. The primary transcriptome  
834 of the major human pathogen Helicobacter pylori. *Nature* **464**, 250-255 (2010).
- 835 43. Toledo-Arana, A., Dussurget, O., Nikitas, G., Sesto, N., Guet-Revillet, H., Balestrino, D., Loh, E.,  
836 Gripenland, J., Tiensuu, T., Vaitkevicius, K., Barthelemy, M., Vergassola, M., Nahori, M. A.,  
837 Soubigou, G., Régnault, B., Coppée, J. Y., Lecuit, M., Johansson, J. & Cossart, P. The Listeria  
838 transcriptional landscape from saprophytism to virulence. *Nature* **459**, 950-956 (2009).
- 839 44. Vogel, J., Bartels, V., Tang, T. H., Churakov, G., Slagter-Jäger, J. G., Hüttenhofer, A. & Wagner,  
840 E. G. RNomics in Escherichia coli detects new sRNA species and indicates parallel transcriptional  
841 output in bacteria. *Nucleic Acids Res* **31**, 6435-6443 (2003).
- 842 45. Tjaden, B. De novo assembly of bacterial transcriptomes from RNA-seq data. *Genome Biol* **16**, 1  
843 (2015).
- 844 46. Andersson, S. G., Zomorodipour, A., Andersson, J. O., Sicheritz-Ponten, T., Alsmark, U. C.,  
845 Podowski, R. M., Naslund, A. K., Eriksson, A. S., Winkler, H. H. & Kurland, C. G. The genome  
846 sequence of Rickettsia prowazekii and the origin of mitochondria. *Nature* **396**, 133-140 (1998).
- 847 47. Georg, J. & Hess, W. R. Widespread Antisense Transcription in Prokaryotes. *Microbiol Spectr* **6**,  
848 (2018).
- 849 48. Wade, J. T. & Grainger, D. C. Pervasive transcription: illuminating the dark matter of bacterial  
850 transcriptomes. *Nat Rev Microbiol* **12**, 647-653 (2014).

- 851 49. Raghavan, R., Sloan, D. B. & Ochman, H. Antisense transcription is pervasive but rarely  
852 conserved in enteric bacteria. *MBio* **3**, (2012).
- 853 50. Lloréns-Rico, V., Cano, J., Kamminga, T., Gil, R., Latorre, A., Chen, W. H., Bork, P., Glass, J. I.,  
854 Serrano, L. & Lluch-Senar, M. Bacterial antisense RNAs are mainly the product of transcriptional  
855 noise. *Sci Adv* **2**, e1501363 (2016).
- 856 51. Andersson, S. G. & Sharp, P. M. Codon usage and base composition in *Rickettsia prowazekii*. *J*  
857 *Mol Evol* **42**, 525-536 (1996).
- 858 52. Botzman, M. & Margalit, H. Variation in global codon usage bias among prokaryotic organisms is  
859 associated with their lifestyles. *Genome Biol* **12**, R109 (2011).
- 860 53. Sharp, P. M., Bailes, E., Grocock, R. J., Peden, J. F. & Sockett, R. E. Variation in the strength of  
861 selected codon usage bias among bacteria. *Nucleic Acids Res* **33**, 1141-1153 (2005).
- 862 54. Duret, L. tRNA gene number and codon usage in the *C. elegans* genome are co-adapted for  
863 optimal translation of highly expressed genes. *Trends Genet* **16**, 287-289 (2000).
- 864 55. Ikemura, T. Correlation between the abundance of *Escherichia coli* transfer RNAs and the  
865 occurrence of the respective codons in its protein genes: a proposal for a synonymous codon  
866 choice that is optimal for the *E. coli* translational system. *J Mol Biol* **151**, 389-409 (1981).
- 867 56. Ikemura, T. Correlation between the abundance of yeast transfer RNAs and the occurrence of the  
868 respective codons in protein genes. Differences in synonymous codon choice patterns of yeast and  
869 *Escherichia coli* with reference to the abundance of isoaccepting transfer RNAs. *J Mol Biol* **158**,  
870 573-597 (1982).
- 871 57. Plotkin, J. B. & Kudla, G. Synonymous but not the same: the causes and consequences of codon  
872 bias. *Nat Rev Genet* **12**, 32-42 (2011).
- 873 58. Frumkin, I., Lajoie, M. J., Gregg, C. J., Hornung, G., Church, G. M. & Pilpel, Y. Codon usage of  
874 highly expressed genes affects proteome-wide translation efficiency. *Proc Natl Acad Sci U S A*  
875 **115**, E4940-E4949 (2018).
- 876 59. Goodman, D. B., Church, G. M. & Kosuri, S. Causes and effects of N-terminal codon bias in  
877 bacterial genes. *Science* **342**, 475-479 (2013).
- 878 60. Ha, N. Y., Kim, Y., Choi, J. H., Choi, M. S., Kim, I. S., Kim, Y. S. & Cho, N. H. Detection of  
879 antibodies against *Orientia tsutsugamushi* Sca proteins in scrub typhus patients and genetic  
880 variation of sca genes of different strains. *Clin Vaccine Immunol* **19**, 1442-1451 (2012).
- 881 61. Ha, N. Y., Sharma, P., Kim, G., Kim, Y., Min, C. K., Choi, M. S., Kim, I. S. & Cho, N. H.  
882 Immunization with an Autotransporter Protein of *Orientia tsutsugamushi* Provides Protective  
883 Immunity against Scrub Typhus. *PLoS Negl Trop Dis* **9**, e0003585 (2015).
- 884 62. Ha, N. Y., Shin, H. M., Sharma, P., Cho, H. A., Min, C. K., Kim, H. I., Yen, N. T., Kang, J. S.,  
885 Kim, I. S., Choi, M. S., Kim, Y. K. & Cho, N. H. Generation of protective immunity against  
886 *Orientia tsutsugamushi* infection by immunization with a zinc oxide nanoparticle combined with  
887 ScaA antigen. *J Nanobiotechnology* **14**, 76 (2016).
- 888 63. VieBrock, L., Evans, S. M., Beyer, A. R., Larson, C. L., Beare, P. A., Ge, H., Singh, S., Rodino,  
889 K. G., Heinzen, R. A., Richards, A. L. & Carlyon, J. A. *Orientia tsutsugamushi* ankyrin repeat-  
890 containing protein family members are Type 1 secretion system substrates that traffic to the host  
891 cell endoplasmic reticulum. *Front Cell Infect Microbiol* **4**, 186 (2014).
- 892 64. Evans, S. M., Rodino, K. G., Adcox, H. E. & Carlyon, J. A. *Orientia tsutsugamushi* uses two Ank  
893 effectors to modulate NF- $\kappa$ B p65 nuclear transport and inhibit NF- $\kappa$ B transcriptional activation.  
894 *PLoS Pathog* **14**, e1007023 (2018).



- 895 65. Cho, K. A., Jun, Y. H., Suh, J. W., Kang, J. S., Choi, H. J. & Woo, S. Y. Orientia tsutsugamushi  
896 induced endothelial cell activation via the NOD1-IL-32 pathway. *Microb Pathog* **49**, 95-104  
897 (2010).
- 898 66. Gharaibeh, M., Hagedorn, M., Lilla, S., Hauptmann, M., Heine, H., Fleischer, B. & Keller, C.  
899 Toll-Like Receptor 2 Recognizes Orientia tsutsugamushi and Increases Susceptibility to Murine  
900 Experimental Scrub Typhus. *Infect Immun* **84**, 3379-3387 (2016).
- 901 67. Kawai, T. & Akira, S. Signaling to NF-kappaB by Toll-like receptors. *Trends Mol Med* **13**, 460-  
902 469 (2007).
- 903 68. Shelite, T. R., Liang, Y., Wang, H., Mendell, N. L., Trent, B. J., Sun, J., Gong, B., Xu, G., Hu, H.,  
904 Bouyer, D. H. & Soong, L. IL-33-Dependent Endothelial Activation Contributes to Apoptosis and  
905 Renal Injury in Orientia tsutsugamushi-Infected Mice. *PLoS Negl Trop Dis* **10**, e0004467 (2016).
- 906 69. McLeod, M. P., Qin, X., Karpathy, S. E., Gioia, J., Highlander, S. K., Fox, G. E., McNeill, T. Z.,  
907 Jiang, H., Muzny, D., Jacob, L. S., Hawes, A. C., Sodergren, E., Gill, R., Hume, J., Morgan, M.,  
908 Fan, G., Amin, A. G., Gibbs, R. A., Hong, C., Yu, X. J., Walker, D. H. & Weinstock, G. M.  
909 Complete genome sequence of Rickettsia typhi and comparison with sequences of other  
910 rickettsiae. *J Bacteriol* **186**, 5842-5855 (2004).
- 911 70. Yildirim, A. & Feig, M. High-resolution 3D models of Caulobacter crescentus chromosome reveal  
912 genome structural variability and organization. *Nucleic Acids Res* **46**, 3937-3952 (2018).
- 913 71. Ellis, M. J. & Haniford, D. B. Riboregulation of bacterial and archaeal transposition. *Wiley*  
914 *Interdiscip Rev RNA* **7**, 382-398 (2016).
- 915 72. Jose, B. R., Gardner, P. P. & Barquist, L. Transcriptional noise and exaptation as sources for  
916 bacterial sRNAs. *Biochem Soc Trans* **47**, 527-539 (2019).
- 917 73. Narra, H. P., Schroeder, C. L., Sahni, A., Rojas, M., Khanipov, K., Fofanov, Y. & Sahni, S. K.  
918 Small Regulatory RNAs of Rickettsia conorii. *Sci Rep* **6**, 36728 (2016).
- 919 74. Schroeder, C. L., Narra, H. P., Rojas, M., Sahni, A., Patel, J., Khanipov, K., Wood, T. G., Fofanov,  
920 Y. & Sahni, S. K. Bacterial small RNAs in the Genus Rickettsia. *BMC Genomics* **16**, 1075 (2015).
- 921 75. Schroeder, C. L., Narra, H. P., Sahni, A., Rojas, M., Khanipov, K., Patel, J., Shah, R., Fofanov, Y.  
922 & Sahni, S. K. Identification and Characterization of Novel Small RNAs in Rickettsia prowazekii.  
923 *Front Microbiol* **7**, 859 (2016).
- 924 76. Livak, K. J. & Schmittgen, T. D. Analysis of relative gene expression data using real-time  
925 quantitative PCR and the 2(-Delta Delta C(T)) Method. *Methods* **25**, 402-408 (2001).
- 926 77. Martin, M. Cutadapt Removes Adapter Sequences From High-throughput Sequencing Reads.  
927 *EMBnet.journal* **17**, 10-12 (2011).
- 928 78. Förstner, K. U., Vogel, J. & Sharma, C. M. READemption-a tool for the computational analysis of  
929 deep-sequencing-based transcriptome data. *Bioinformatics* **30**, 3421-3423 (2014).
- 930 79. Otto, C., Stadler, P. F. & Hoffmann, S. Lacking alignments? The next-generation sequencing  
931 mapper segemehl revisited. *Bioinformatics* **30**, 1837-1843 (2014).
- 932 80. Huerta-Cepas, J., Szklarczyk, D., Forslund, K., Cook, H., Heller, D., Walter, M. C., Rattei, T.,  
933 Mende, D. R., Sunagawa, S., Kuhn, M., Jensen, L. J., von Mering, C. & Bork, P. eggNOG 4.5: a  
934 hierarchical orthology framework with improved functional annotations for eukaryotic,  
935 prokaryotic and viral sequences. *Nucleic Acids Res* **44**, D286-93 (2016).
- 936 81. Krämer, A., Green, J., Pollard, J. & Tugendreich, S. Causal analysis approaches in Ingenuity  
937 Pathway Analysis. *Bioinformatics* **30**, 523-530 (2014).
- 938 82. Subbian, S., Bandyopadhyay, N., Tsenova, L., O'Brien, P., Khetani, V., Kushner, N. L., Peixoto,  
939 B., Soteropoulos, P., Bader, J. S., Karakousis, P. C., Fallows, D. & Kaplan, G. Early innate

940 immunity determines outcome of Mycobacterium tuberculosis pulmonary infection in rabbits. *Cell*  
941 *Commun Signal* **11**, 60 (2013).  
942

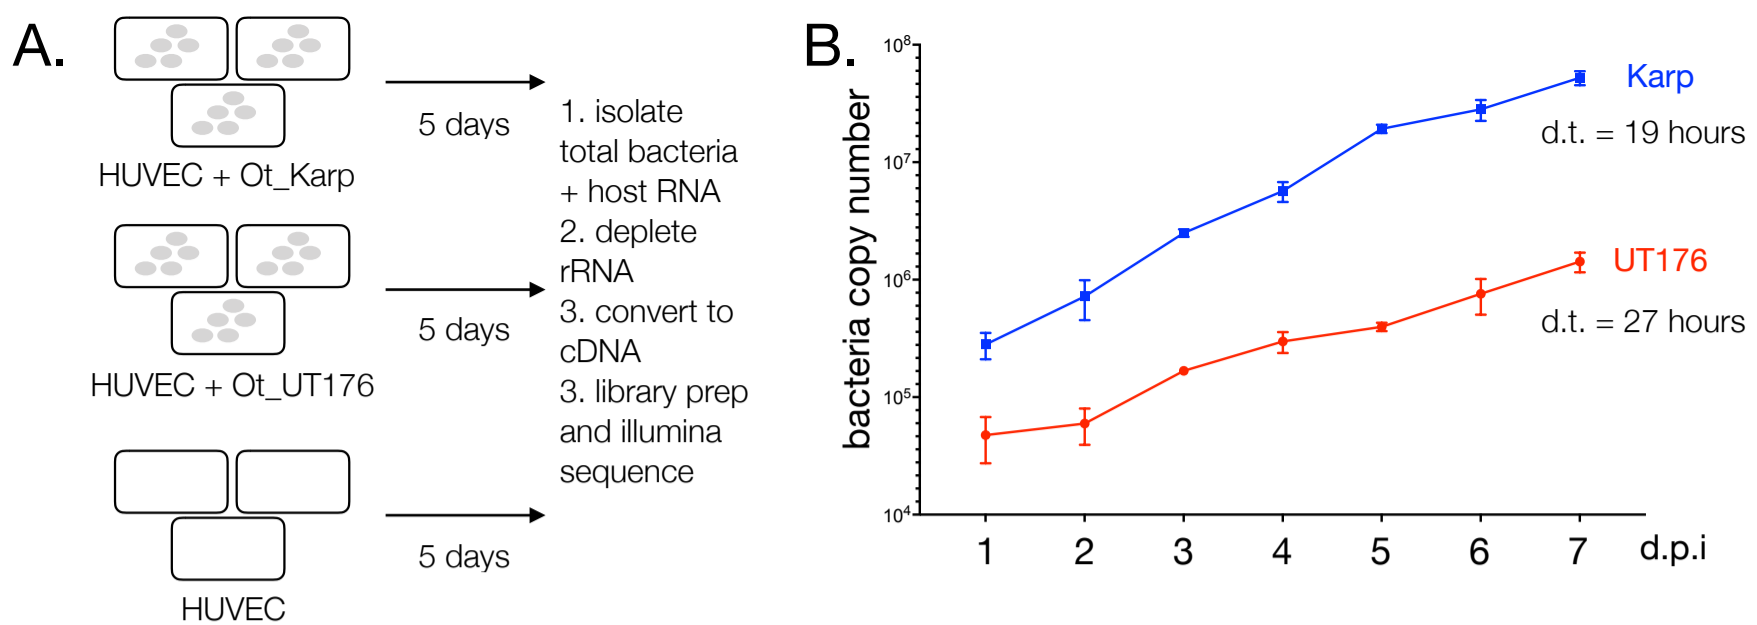

bioRxiv preprint doi: <https://doi.org/10.1101/743641>; this version posted October 29, 2019. The copyright holder for this preprint (which was not certified by peer review) is the author/funder, who has granted bioRxiv a license to display the preprint in perpetuity. It is made available under aCC-BY-NC-ND 4.0 International license.

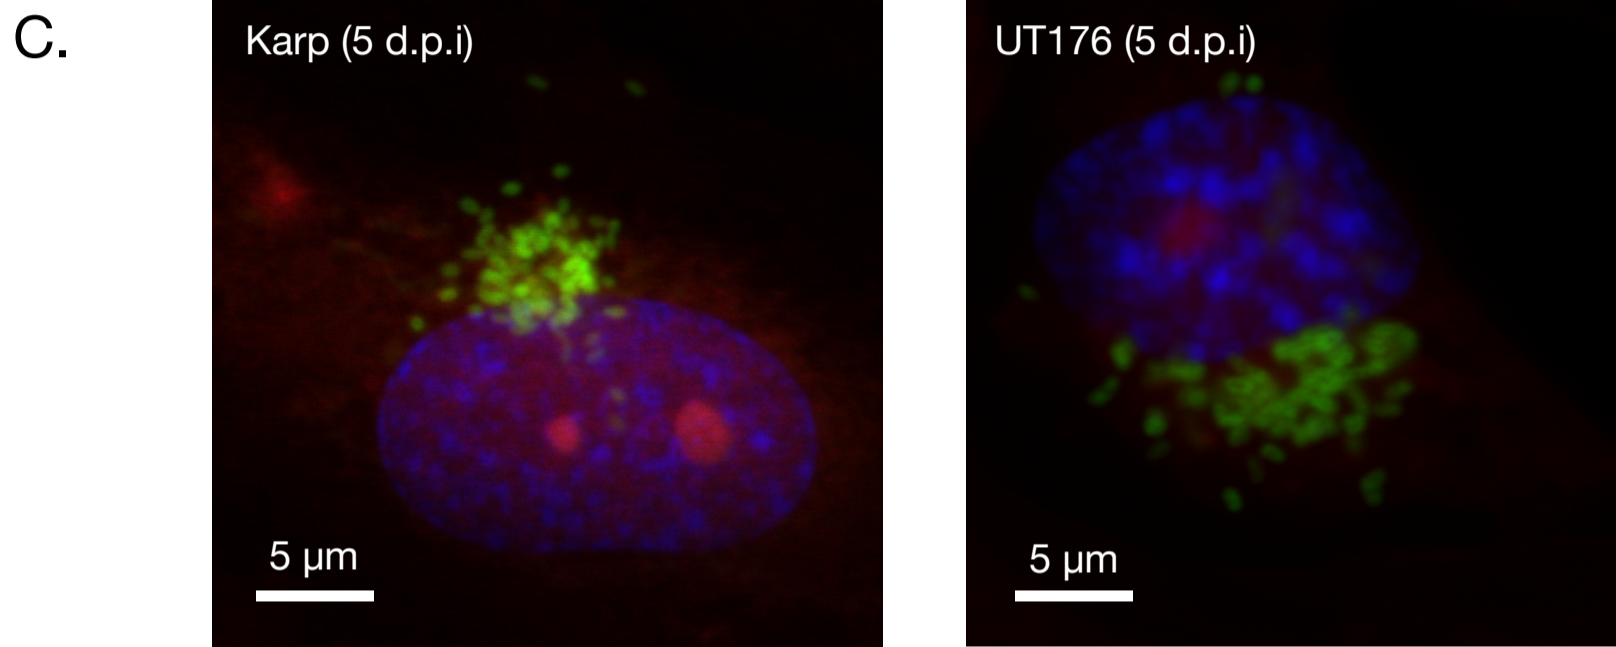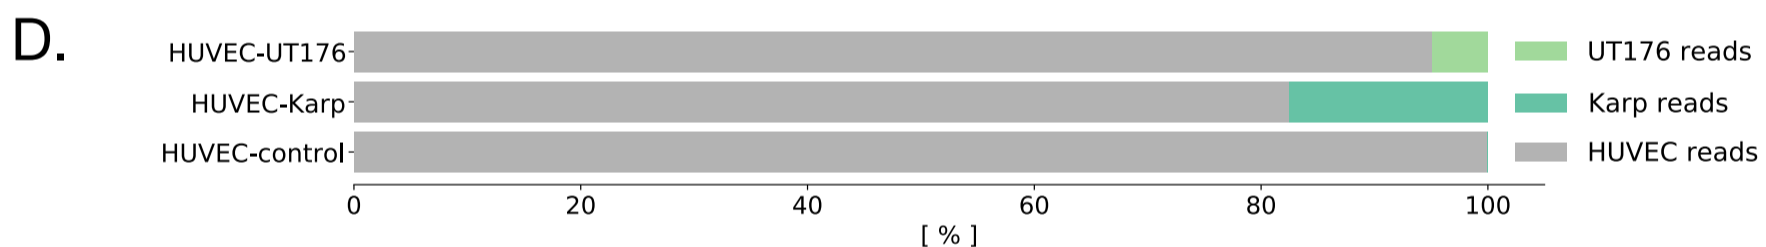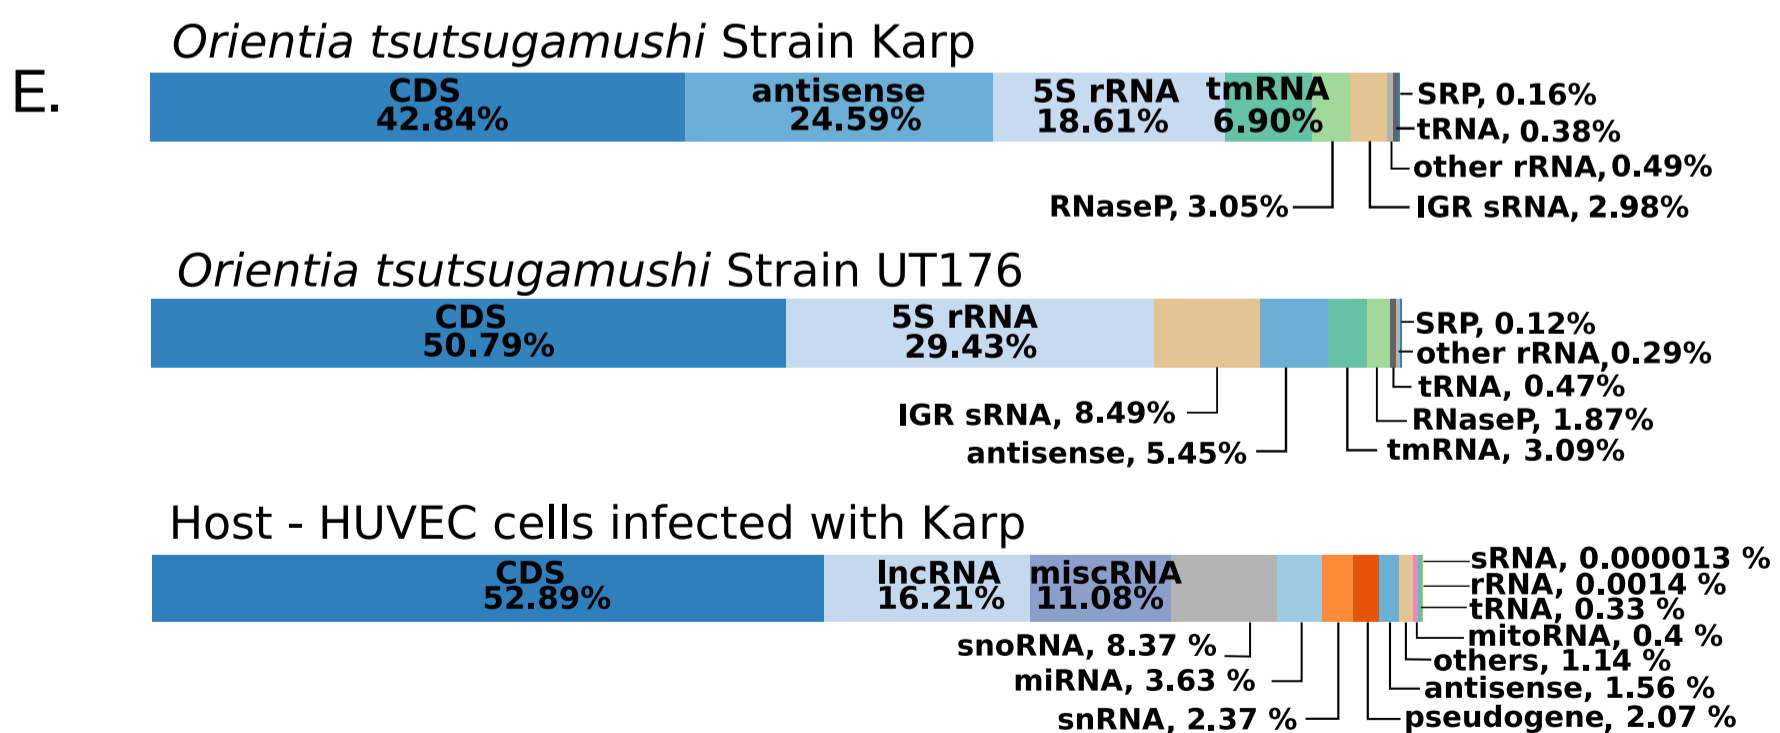

**Figure 1. Overview.** **A.** Schematic experimental overview. HUVEC = human umbilical vein endothelial cell. **B.** Growth curve showing replication of Ot in cultured HUVEC cells. Bacteria were grown in 24 well plates and the total bacteria per well is shown. Mean and SD from three independent replicates are shown. **C.** Confocal microscopy images of Ot in HUVEC cells 5 days post infection. Additional images and time points are shown in Supp. Fig. 1 and 2. Blue = DAPI (DNA), Red = Evans blue (host cells), green = Ot labelled with Alexa488-click-methionine. **D.** RNA mapping statistics showing the fraction of host and Ot RNA for each condition. The mean of three independent experiments is shown. Individual results for each replicate are shown in Supp. Fig. 3. **E.** Percentage of RNA-seq reads assigned to different classes of RNA in Karp, UT176 and HUVEC.

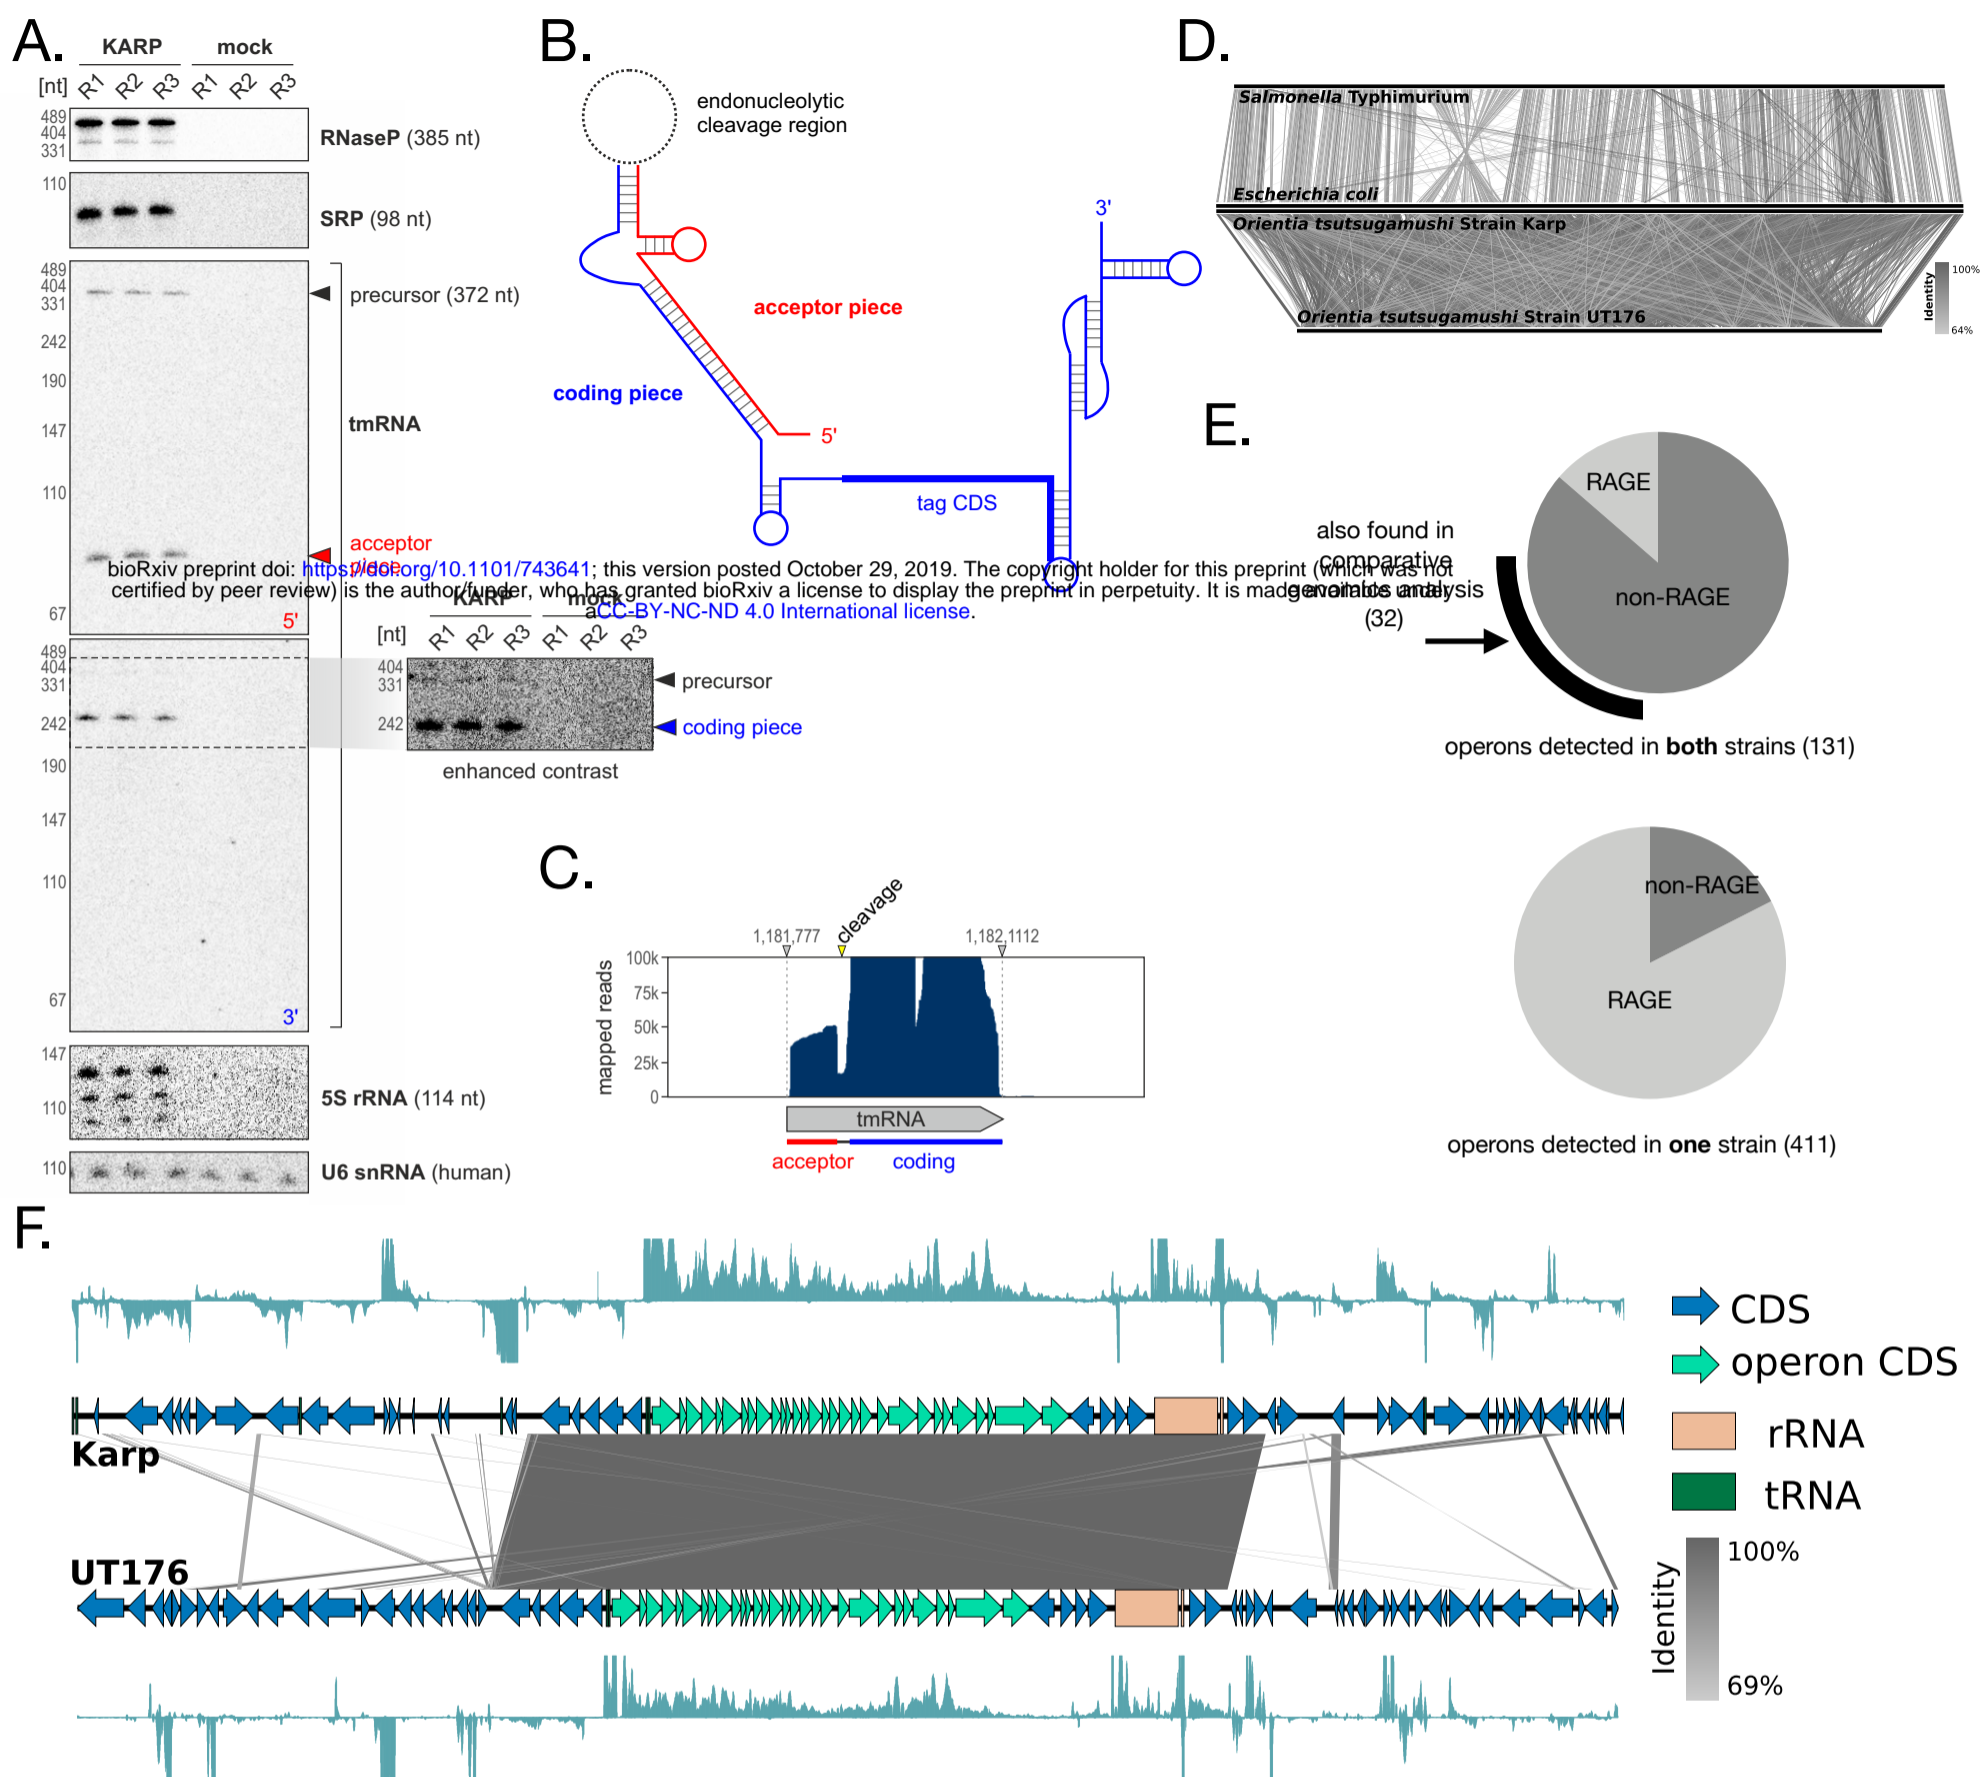

**Figure 2. RNA biology in *Ot*.** **A.** Northern blot analysis of core non-coding RNAs in *Ot*. **B.** Structure of the two-piece tmRNA observed in the *Ot* transcriptome **C.** RNA-seq read coverage over the tmRNA gene mirrors cleavage observed by Northern blot. **D.** A comparison of genomic synteny of two species within the enterobacteriaceae (*Escherichia coli* MG1655 and *Salmonella enterica* serovar Typhimurium SL1344, top), with synteny between the two *Orientia* strains from this study (bottom). **E.** Pie charts illustrating the relative abundance of RAGE genes in conserved (right) and strain-specific (left) operons. **F.** Visualization of the largest conserved operon in *Ot*, encoding multiple ribosomal genes, showing RNA-seq coverage in both strains.

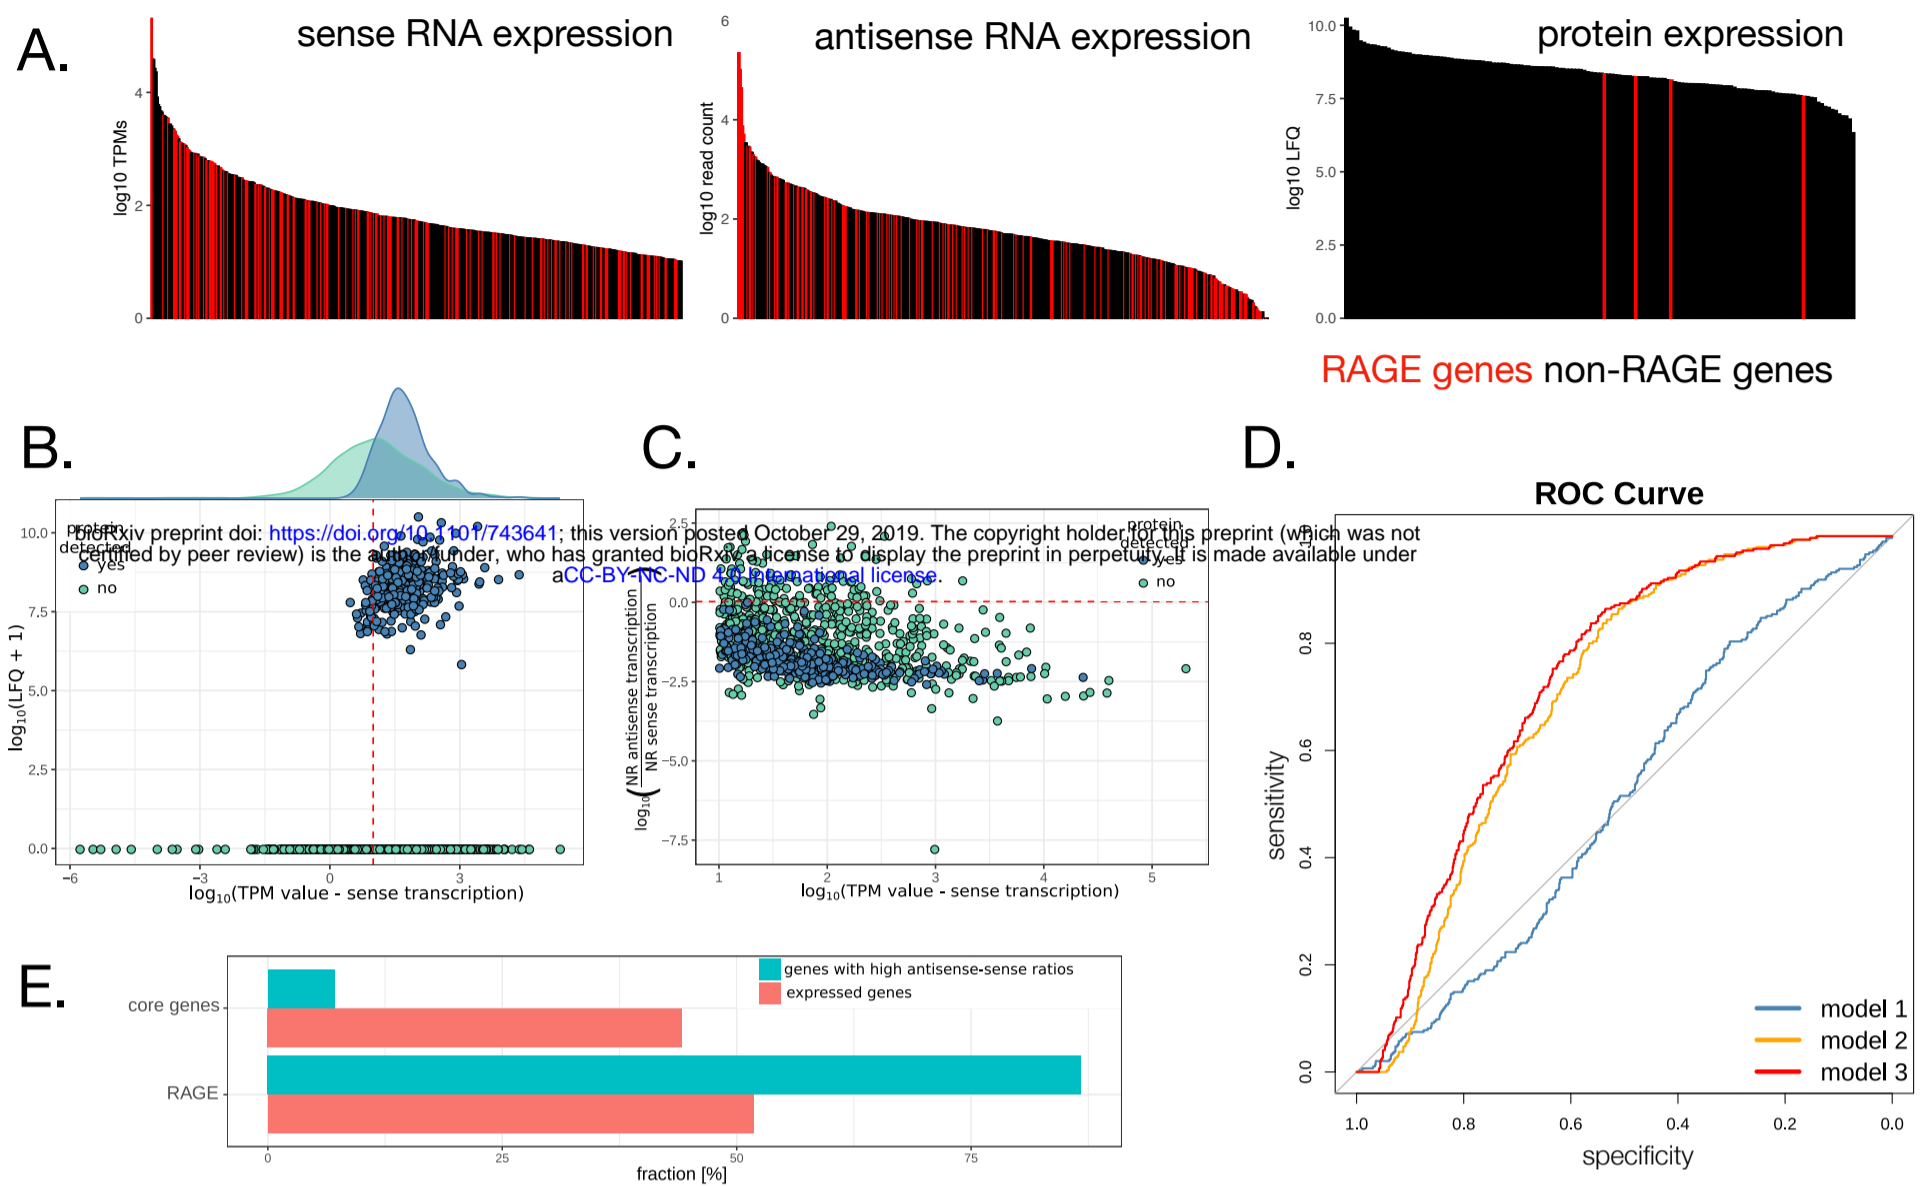

**Figure 3. Antisense transcription is enriched on mobile genetic elements and is predictive of an absence of protein expression.** **A.** **B.** Plot showing the relationship between protein expression, defined by LFQs, and transcript expression, defined by TPMs. Genes cluster into two groups based on their protein expression. The red line indicates the threshold for expressed genes (TPM value equal to 10). **C.** Sense transcription and the ratio of reads assigned to the antisense and sense strands, showing classification based on proteomics detection. The red line indicates the sense-antisense ratio (1.059182) above which translation was not detected by mass spectrometry. **D.** ROC curves evaluating the performance of logistic regression models to predict protein expression from RNA-seq read counts. Model 1 strictly uses sense expression, Model 2 the antisense-sense ratio, and Model 3 uses both. Incorporating antisense expression clearly improves model performance. **E.** Fraction of core genes and RAGE genes in the set of genes with high antisense-sense ratios, compared to all expressed genes.

A.

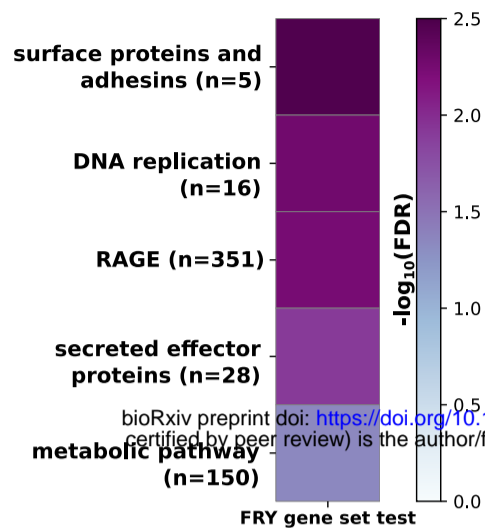

B.

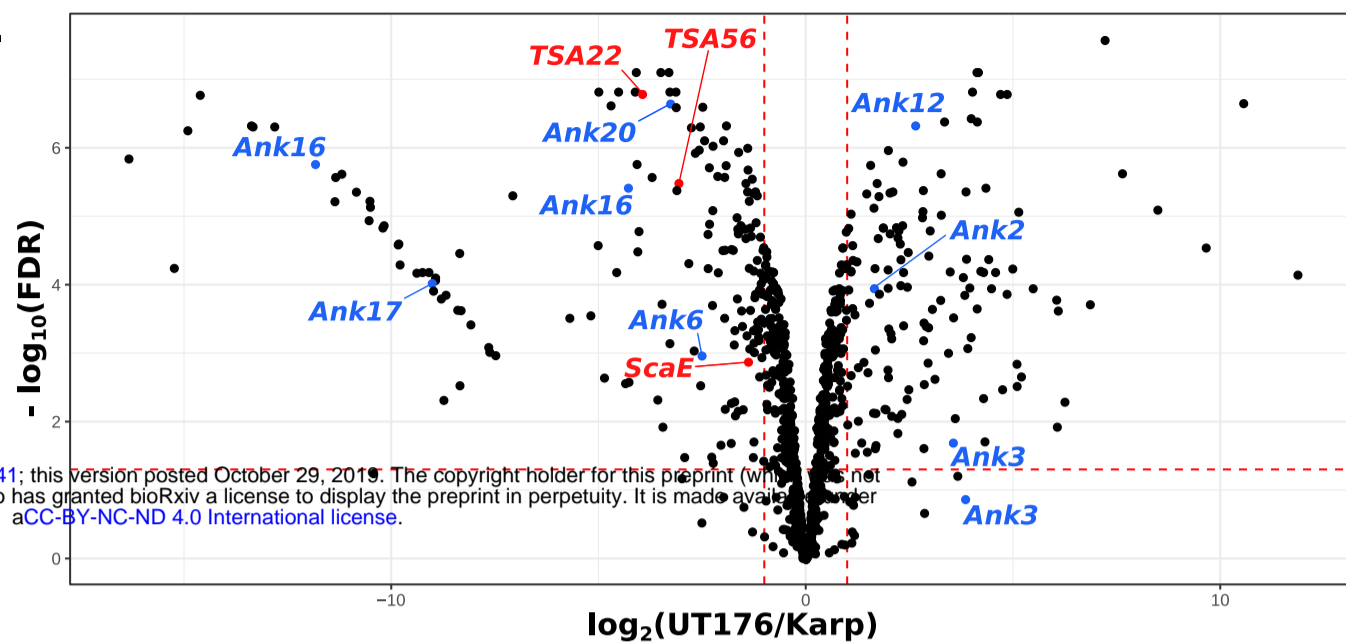

**Figure 4. Differential bacterial gene expression.** **A.** Heatmap illustrating pathways enriched in differentially expressed genes. All illustrated categories are more highly expressed in Karp. **B.** Volcano plot showing differential expression of bacterial genes in Karp and UT176. Bacterial surface genes (red) and ankyrin repeat containing effector proteins (blue) with log fold change  $\geq 1$  are highlighted.

A.

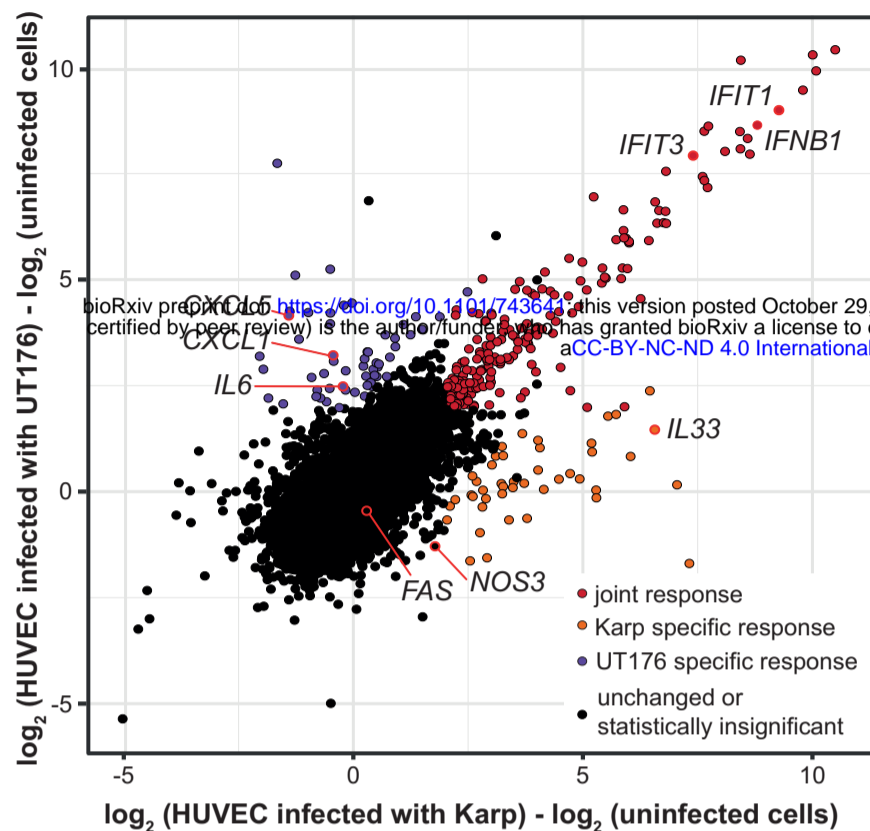

B.

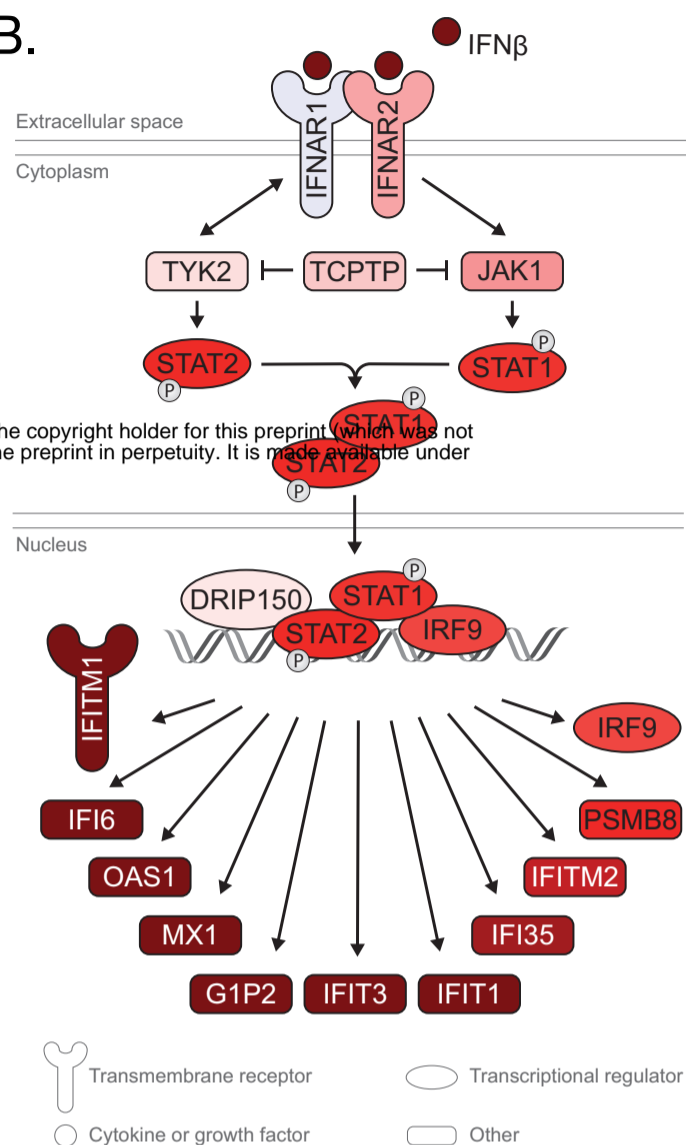

C.

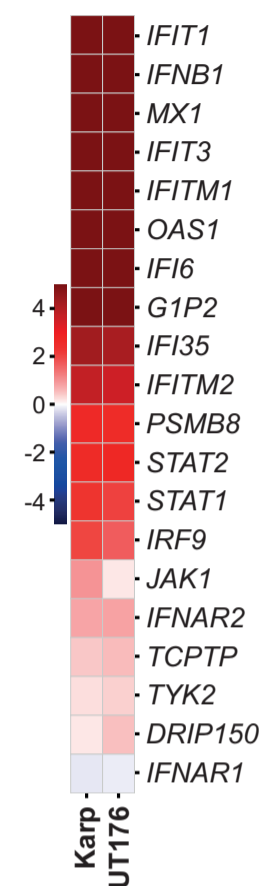

**Figure 5. Ot induces an antiviral interferon response in HUVECs.** **A.** Summary of the host response showing joint and strain specific responses. **B.** Activation of multiple genes in the canonical interferon signaling pathway in Karp infected HUVECs compared with uninfected HUVEC cells. **C.** Heat map showing up-regulation of genes in the interferon signaling pathway in HUVECs infected with Karp and UT176 compared with uninfected cells.





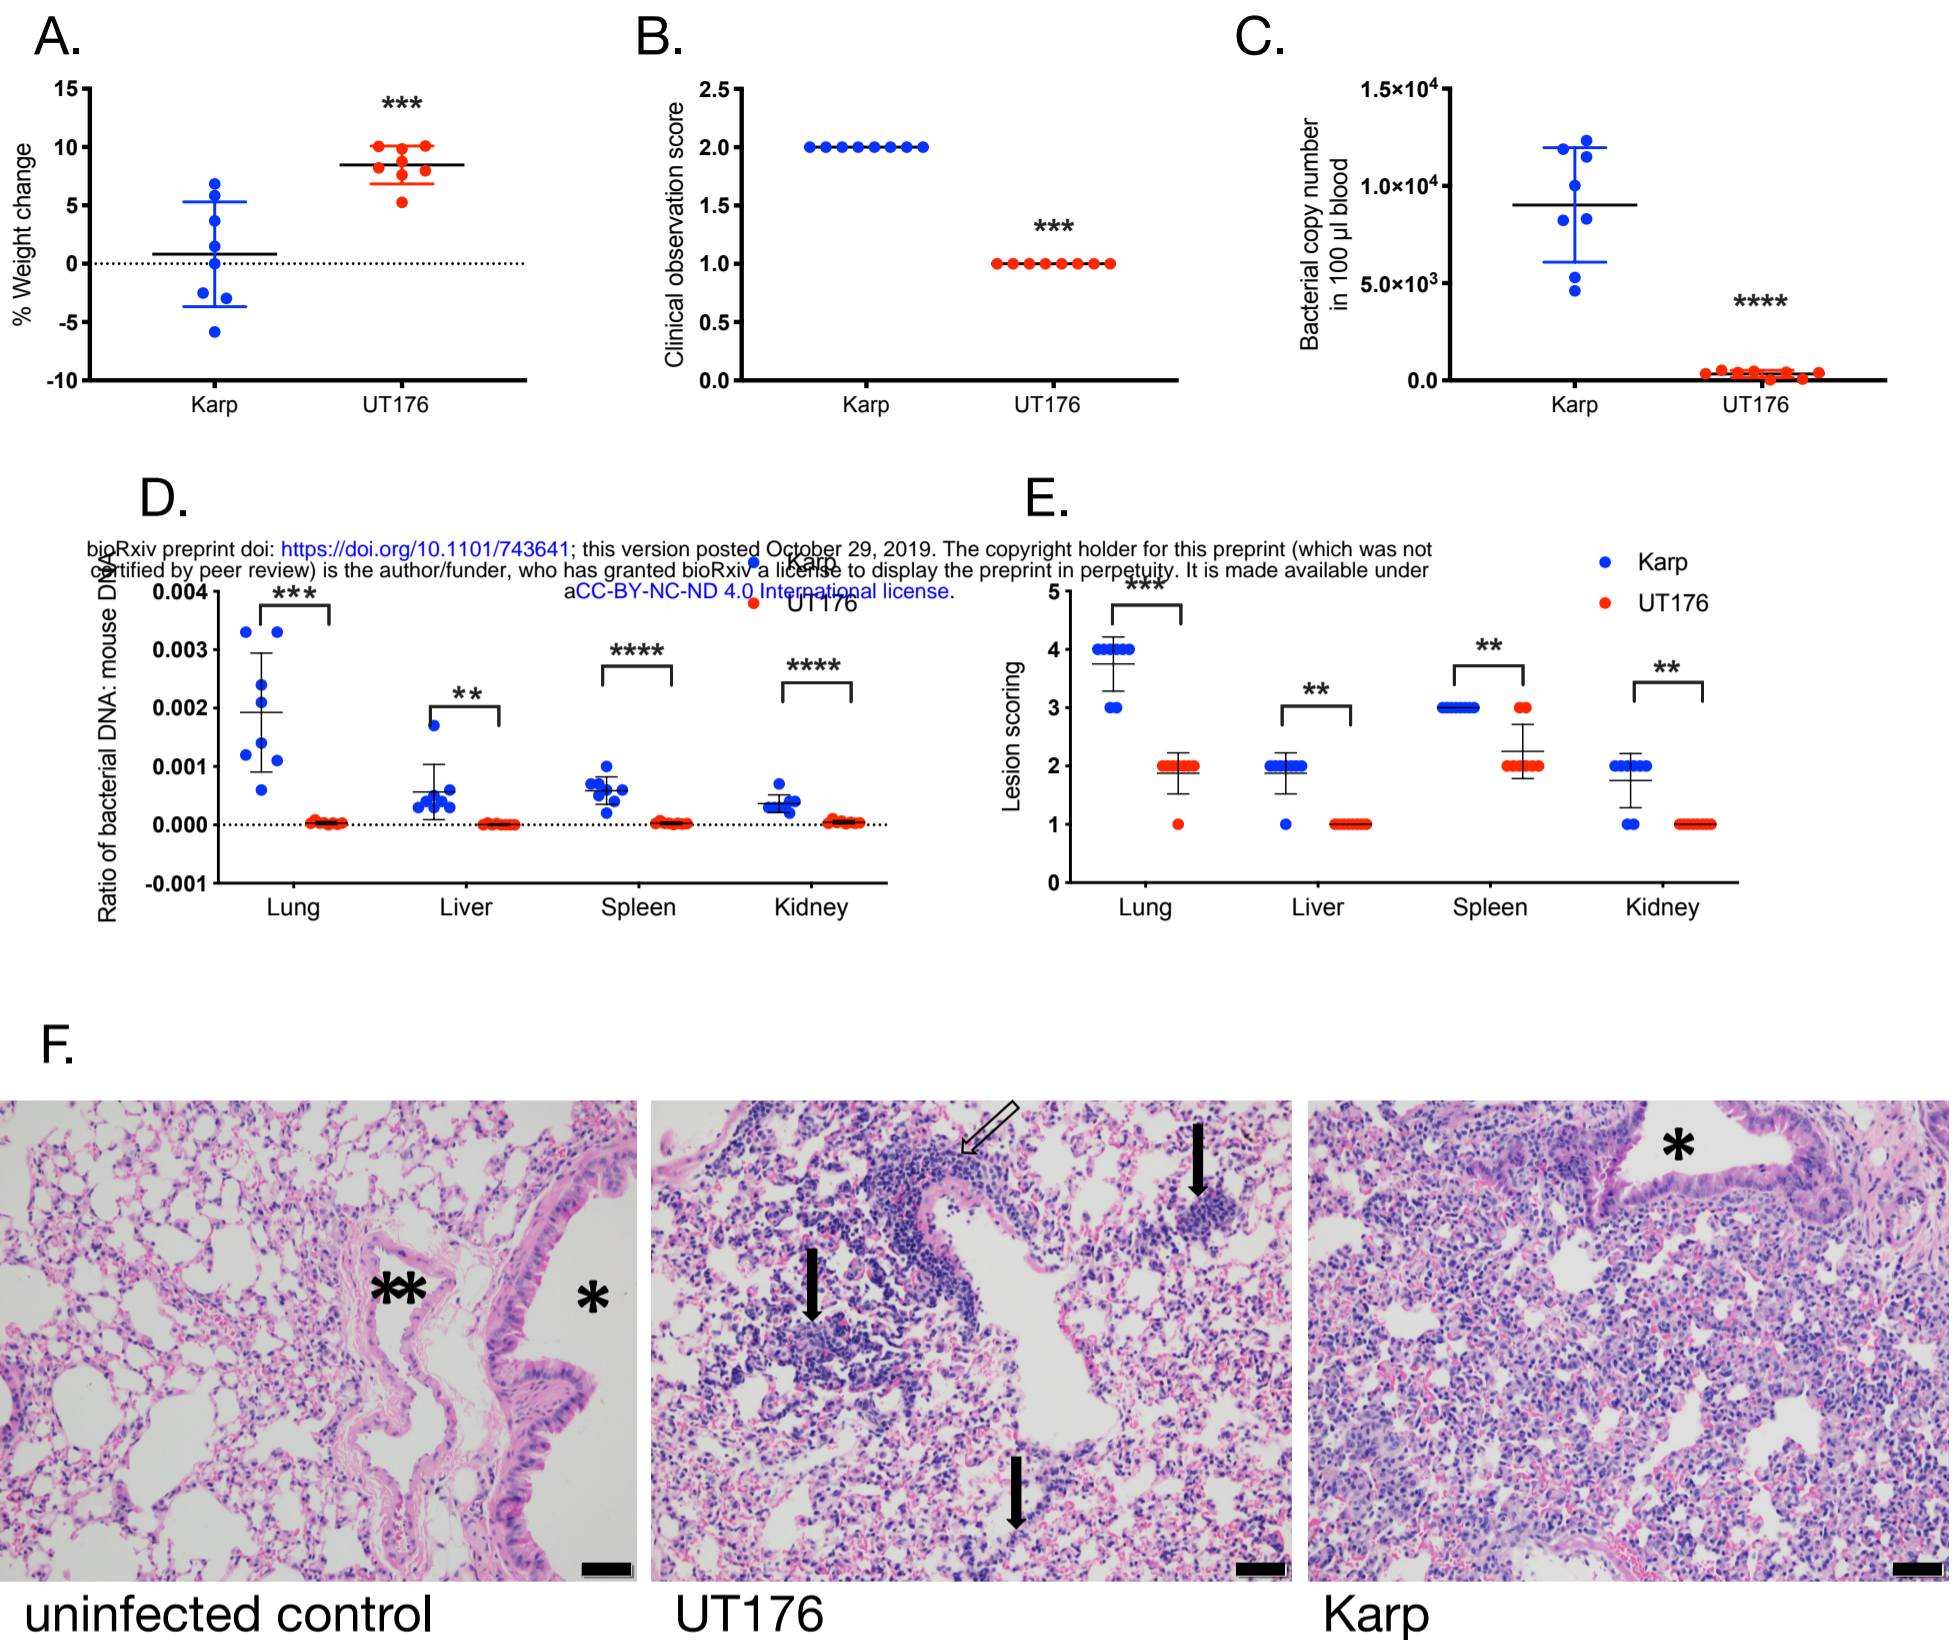

**Figure 7. Karp is more virulent than UT176 in a mouse infection model.** **A.** Weight change over 12 days infection. **B.** Clinical observation score of mice 12 days post infection. This number is a composite score based on appetite, activity, and hair coat with higher numbers representing low appetite, low activity, and ruffled fur. Details provided in Supp. Fig. 20. **C.** Bacterial copy number in 100  $\mu$ l blood taken from euthanized mice 12 days post infection, measured by qPCR. **D.** Ratio of bacterial DNA copy number to mouse DNA copy number in lung, liver, spleen, and kidney of euthanized mice 12 days post infection, measured by qPCR. **E.** Lesion scores of Hematoxylin and Eosin stained lung, liver, spleen, and kidneys of euthanized mice 12 days post infection. Scores range from 0 to 5 with 0 representing normal tissue and 5 representing severe lesion damage. All graphs show mean and standard deviation. Statistical significance is calculated using unpaired t test using GraphPad Prism software. \*\* $p \leq 0.01$  \*\*\* $p \leq 0.001$  \*\*\*\* $p \leq 0.0001$  **F.** Images of Hematoxylin and Eosin stained lung tissue of mice infected with buffer, UT176 or Karp. Scale bars = 50  $\mu$ m. \* indicates airway and \*\* indicates blood vessel. Uninfected control: airway, blood vessel and alveoli all appear normal. UT176-infected lungs: There is diffuse thickening and infiltration of alveolar septa with a mixed population of macrophages and lymphocytes (arrows). There is also mild perivascular lymphohistiocytic inflammation (open arrow). Karp-infected lungs: There is diffuse moderate thickening and infiltration of alveolar septa with a mixed population of macrophages and lymphocytes. The airway (\*) is unaffected and normal. Additional figures are shown in Supp. Fig. 20.
